# Supplementary material
Source: Springer Nature journal article supplement (https://cris.unibo.it/retrieve/aa8e1617-36e5-4737-9828-507bb80bc162/41598_2026_43936_MOESM1_ESM.pdf)

**Supplementary Material 1**

**Biogeography from a food matrix: a temporal distribution  
map of *Apis mellifera* mitochondrial DNA lineages across It-  
aly, obtained from honey samples**

Valeria Taurisano, Anisa Ribani, Maria Letizia Calabri, Giuseppina Schiavo, Kate Elise Nelson  
Johnson, Valerio Joe Utzeri, Samuele Bovo, Francesca Bertolini and Luca Fontanesi

**Supplementary Table S1.** Frequencies of honey-derived mtDNA lineage patterns divided by regions and macro-regions considering the group of years from 2018 to 2023 and for single years in this period.

| Regions <sup>1</sup>  | Years <sup>2</sup> | All samples                       |           |             |          |           |           |            |            |            |             |            | Unique samples                    |           |             |          |           |           |            |            |            |             |            |
|-----------------------|--------------------|-----------------------------------|-----------|-------------|----------|-----------|-----------|------------|------------|------------|-------------|------------|-----------------------------------|-----------|-------------|----------|-----------|-----------|------------|------------|------------|-------------|------------|
|                       |                    | No. of honey samples <sup>3</sup> | A         | C           | M        | AC        | AM        | CM         | ACM        | A*         | C*          | M*         | No. of honey samples <sup>4</sup> | A         | C           | M        | AC        | AM        | CM         | ACM        | A*         | C*          | M*         |
| Piedmont (Piemonte)   | 2018-2023          | 388                               | 5         | 281         | 0        | 15        | 2         | 14         | 71         | 93         | 381         | 87         | 321                               | 4         | 233         | 0        | 13        | 2         | 13         | 56         | 75         | 315         | 71         |
| Valle d'Aosta         | 2018-2023          | 90                                | 1         | 75          | 0        | 3         | 0         | 5          | 6          | 10         | 89          | 11         | 44                                | 1         | 37          | 0        | 2         | 0         | 2          | 2          | 5          | 43          | 4          |
| Liguria               | 2018-2023          | 63                                | 1         | 54          | 0        | 0         | 1         | 4          | 3          | 5          | 61          | 8          | 50                                | 1         | 43          | 0        | 0         | 1         | 2          | 3          | 5          | 48          | 6          |
| Lombardy (Lombardia)  | 2018-2023          | 402                               | 3         | 301         | 0        | 10        | 1         | 18         | 69         | 83         | 398         | 88         | 325                               | 3         | 243         | 0        | 7         | 1         | 17         | 54         | 65         | 321         | 72         |
| Trentino-Alto Adige   | 2018-2023          | 145                               | 2         | 120         | 0        | 3         | 1         | 10         | 9          | 15         | 142         | 20         | 112                               | 2         | 91          | 0        | 3         | 0         | 9          | 7          | 12         | 110         | 16         |
| Veneto                | 2018-2023          | 270                               | 1         | 238         | 1        | 2         | 0         | 17         | 11         | 14         | 268         | 29         | 175                               | 1         | 148         | 1        | 2         | 0         | 14         | 9          | 12         | 173         | 24         |
| Friuli-Venezia Giulia | 2018-2023          | 143                               | 1         | 132         | 0        | 3         | 1         | 4          | 2          | 7          | 141         | 7          | 81                                | 1         | 73          | 0        | 1         | 1         | 4          | 1          | 4          | 79          | 6          |
| Emilia-Romagna        | 2018-2023          | 873                               | 0         | 790         | 0        | 6         | 0         | 34         | 43         | 49         | 873         | 77         | 473                               | 0         | 436         | 0        | 2         | 0         | 13         | 22         | 24         | 473         | 35         |
| Tuscany (Toscana)     | 2018-2023          | 186                               | 1         | 149         | 0        | 2         | 0         | 15         | 19         | 22         | 185         | 34         | 160                               | 1         | 127         | 0        | 2         | 0         | 13         | 17         | 20         | 159         | 30         |
| Umbria                | 2018-2023          | 66                                | 0         | 52          | 0        | 1         | 0         | 9          | 4          | 5          | 66          | 13         | 56                                | 0         | 45          | 0        | 1         | 0         | 7          | 3          | 4          | 56          | 10         |
| Marche                | 2018-2023          | 127                               | 0         | 109         | 0        | 2         | 0         | 8          | 8          | 10         | 127         | 16         | 103                               | 0         | 87          | 0        | 2         | 0         | 6          | 8          | 10         | 103         | 14         |
| Lazio                 | 2018-2023          | 170                               | 2         | 103         | 1        | 3         | 1         | 21         | 39         | 45         | 166         | 62         | 137                               | 2         | 82          | 1        | 1         | 1         | 19         | 31         | 35         | 133         | 52         |
| Abruzzo               | 2018-2023          | 157                               | 0         | 98          | 3        | 7         | 1         | 9          | 39         | 47         | 153         | 52         | 118                               | 0         | 75          | 2        | 7         | 1         | 6          | 27         | 35         | 115         | 36         |
| Molise                | 2018-2023          | 86                                | 1         | 56          | 0        | 2         | 1         | 9          | 17         | 21         | 84          | 27         | 69                                | 1         | 45          | 0        | 1         | 1         | 7          | 14         | 17         | 67          | 22         |
| Campania              | 2018-2023          | 130                               | 1         | 85          | 1        | 5         | 0         | 8          | 30         | 36         | 128         | 39         | 111                               | 1         | 72          | 1        | 5         | 0         | 8          | 24         | 30         | 109         | 33         |
| Puglia                | 2018-2023          | 225                               | 1         | 138         | 0        | 0         | 0         | 16         | 70         | 71         | 224         | 86         | 171                               | 1         | 109         | 0        | 0         | 0         | 12         | 49         | 50         | 170         | 61         |
| Basilicata            | 2018-2023          | 123                               | 0         | 68          | 0        | 0         | 3         | 19         | 33         | 36         | 120         | 55         | 99                                | 0         | 53          | 0        | 0         | 3         | 17         | 26         | 29         | 96          | 46         |
| Calabria              | 2018-2023          | 90                                | 0         | 44          | 0        | 2         | 2         | 7          | 35         | 39         | 88          | 44         | 78                                | 0         | 37          | 0        | 2         | 2         | 6          | 31         | 35         | 76          | 39         |
| Sicily (Sicilia)      | 2018-2023          | 188                               | 75        | 53          | 1        | 21        | 3         | 10         | 25         | 124        | 109         | 39         | 156                               | 64        | 41          | 0        | 18        | 3         | 10         | 20         | 105        | 89          | 33         |
| Sardinia (Sardegna)   | 2018-2023          | 228                               | 2         | 188         | 0        | 7         | 0         | 12         | 19         | 28         | 226         | 31         | 146                               | 1         | 121         | 0        | 5         | 16        | 5          | 14         | 36         | 145         | 35         |
| <b>All Italy</b>      | <b>2018-2023</b>   | <b>4150</b>                       | <b>97</b> | <b>3134</b> | <b>7</b> | <b>94</b> | <b>17</b> | <b>249</b> | <b>552</b> | <b>760</b> | <b>4029</b> | <b>825</b> | <b>2985</b>                       | <b>84</b> | <b>2198</b> | <b>5</b> | <b>74</b> | <b>32</b> | <b>190</b> | <b>418</b> | <b>608</b> | <b>2880</b> | <b>645</b> |
| Piedmont (Piemonte)   | 2018               | 56                                | 0         | 46          | 0        | 0         | 0         | 3          | 7          | 53         | 10          | 10         | 55                                | 0         | 45          | 0        | 0         | 0         | 3          | 7          | 7          | 55          | 10         |
| Valle d'Aosta         | 2018               | 8                                 | 0         | 7           | 0        | 0         | 0         | 1          | 0          | 7          | 1           | 1          | 8                                 | 0         | 7           | 0        | 0         | 0         | 1          | 0          | 0          | 8           | 1          |
| Liguria               | 2018               | 9                                 | 0         | 8           | 0        | 0         | 0         | 1          | 0          | 8          | 1           | 1          | 9                                 | 0         | 8           | 0        | 0         | 0         | 1          | 0          | 0          | 9           | 1          |
| Lombardy (Lombardia)  | 2018               | 71                                | 0         | 50          | 0        | 3         | 0         | 6          | 12         | 62         | 18          | 21         | 68                                | 0         | 49          | 0        | 2         | 0         | 6          | 11         | 13         | 68          | 17         |
| Trentino-Alto Adige   | 2018               | 23                                | 1         | 8           | 0        | 3         | 0         | 8          | 3          | 11         | 11          | 14         | 22                                | 1         | 8           | 0        | 3         | 0         | 8          | 2          | 6          | 21          | 10         |
| Veneto                | 2018               | 41                                | 0         | 28          | 0        | 1         | 0         | 7          | 5          | 33         | 12          | 13         | 40                                | 0         | 27          | 0        | 1         | 0         | 7          | 5          | 6          | 40          | 12         |
| Friuli-Venezia Giulia | 2018               | 22                                | 0         | 20          | 0        | 0         | 0         | 2          | 0          | 20         | 2           | 2          | 22                                | 0         | 20          | 0        | 0         | 0         | 2          | 0          | 0          | 22          | 2          |
| Emilia-Romagna        | 2018               | 101                               | 0         | 84          | 0        | 0         | 0         | 7          | 10         | 94         | 17          | 17         | 61                                | 0         | 52          | 0        | 0         | 0         | 2          | 7          | 7          | 61          | 9          |
| Tuscany (Toscana)     | 2018               | 37                                | 0         | 29          | 0        | 0         | 0         | 4          | 4          | 33         | 8           | 8          | 36                                | 0         | 28          | 0        | 0         | 0         | 4          | 4          | 4          | 36          | 8          |
| Umbria                | 2018               | 15                                | 0         | 12          | 0        | 1         | 0         | 1          | 1          | 13         | 2           | 3          | 15                                | 0         | 12          | 0        | 1         | 0         | 1          | 1          | 2          | 15          | 2          |
| Marche                | 2018               | 22                                | 0         | 18          | 0        | 0         | 0         | 0          | 4          | 22         | 4           | 4          | 22                                | 0         | 18          | 0        | 0         | 0         | 0          | 4          | 4          | 22          | 4          |
| Lazio                 | 2018               | 29                                | 1         | 21          | 0        | 0         | 0         | 4          | 3          | 24         | 7           | 7          | 29                                | 1         | 21          | 0        | 0         | 0         | 4          | 3          | 4          | 28          | 7          |
| Abruzzo               | 2018               | 22                                | 0         | 18          | 0        | 0         | 0         | 1          | 3          | 21         | 4           | 4          | 21                                | 0         | 17          | 0        | 0         | 0         | 1          | 3          | 3          | 21          | 4          |
| Molise                | 2018               | 10                                | 0         | 6           | 0        | 1         | 0         | 2          | 1          | 7          | 3           | 4          | 10                                | 0         | 6           | 0        | 1         | 0         | 2          | 1          | 2          | 10          | 3          |
| Campania              | 2018               | 26                                | 0         | 19          | 0        | 0         | 0         | 2          | 5          | 24         | 7           | 7          | 25                                | 0         | 18          | 0        | 0         | 0         | 2          | 5          | 5          | 25          | 7          |
| Puglia                | 2018               | 37                                | 1         | 25          | 0        | 0         | 0         | 2          | 9          | 34         | 11          | 11         | 34                                | 1         | 22          | 0        | 0         | 0         | 2          | 9          | 10         | 33          | 11         |
| Basilicata            | 2018               | 20                                | 0         | 12          | 0        | 0         | 0         | 5          | 3          | 15         | 8           | 8          | 20                                | 0         | 12          | 0        | 0         | 0         | 5          | 3          | 3          | 20          | 8          |
| Calabria              | 2018               | 9                                 | 0         | 5           | 0        | 0         | 0         | 2          | 2          | 7          | 4           | 4          | 9                                 | 0         | 5           | 0        | 0         | 0         | 2          | 2          | 2          | 9           | 4          |
| Sicily (Sicilia)      | 2018               | 29                                | 12        | 7           | 0        | 0         | 2         | 5          | 3          | 12         | 10          | 8          | 28                                | 11        | 7           | 0        | 0         | 2         | 5          | 3          | 16         | 15          | 10         |
| Sardinia (Sardegna)   | 2018               | 45                                | 0         | 35          | 0        | 2         | 0         | 4          | 4          | 39         | 8           | 10         | 24                                | 0         | 20          | 0        | 1         | 0         | 1          | 2          | 3          | 24          | 3          |
| <b>All Italy</b>      | <b>2018</b>        | <b>632</b>                        | <b>15</b> | <b>458</b>  | <b>0</b> | <b>11</b> | <b>2</b>  | <b>67</b>  | <b>79</b>  | <b>537</b> | <b>146</b>  | <b>157</b> | <b>558</b>                        | <b>14</b> | <b>402</b>  | <b>0</b> | <b>9</b>  | <b>2</b>  | <b>59</b>  | <b>72</b>  | <b>97</b>  | <b>542</b>  | <b>133</b> |
| Piedmont (Piemonte)   | 2019               | 49                                | 2         | 38          | 0        | 0         | 1         | 2          | 6          | 9          | 46          | 9          | 46                                | 2         | 35          | 0        | 0         | 1         | 2          | 6          | 9          | 43          | 9          |
| Valle d'Aosta         | 2019               | 21                                | 1         | 18          | 0        | 0         | 0         | 1          | 1          | 2          | 20          | 2          | 8                                 | 1         | 5           | 0        | 0         | 0         | 1          | 1          | 2          | 7           | 2          |
| Liguria               | 2019               | 7                                 | 0         | 6           | 0        | 0         | 0         | 0          | 1          | 1          | 7           | 1          | 6                                 | 0         | 5           | 0        | 0         | 0         | 0          | 1          | 1          | 6           | 1          |
| Lombardy (Lombardia)  | 2019               | 50                                | 1         | 40          | 0        | 1         | 0         | 5          | 3          | 5          | 49          | 8          | 44                                | 1         | 36          | 0        | 0         | 0         | 5          | 2          | 3          | 43          | 7          |

|                       |             |            |           |            |          |           |          |           |           |            |            |            |            |           |            |          |           |          |           |           |           |            |           |
|-----------------------|-------------|------------|-----------|------------|----------|-----------|----------|-----------|-----------|------------|------------|------------|------------|-----------|------------|----------|-----------|----------|-----------|-----------|-----------|------------|-----------|
| Trentino-Alto Adige   | 2019        | 21         | 0         | 20         | 0        | 0         | 0        | 1         | 0         | 0          | 21         | 1          | 14         | 0         | 14         | 0        | 0         | 0        | 0         | 0         | 0         | 14         | 0         |
| Veneto                | 2019        | 25         | 0         | 24         | 0        | 0         | 0        | 0         | 1         | 1          | 25         | 1          | 16         | 0         | 15         | 0        | 0         | 0        | 0         | 1         | 1         | 16         | 1         |
| Friuli-Venezia Giulia | 2019        | 21         | 0         | 21         | 0        | 0         | 0        | 0         | 0         | 0          | 21         | 0          | 8          | 0         | 8          | 0        | 0         | 0        | 0         | 0         | 0         | 8          | 0         |
| Emilia-Romagna        | 2019        | 64         | 0         | 50         | 0        | 0         | 0        | 8         | 6         | 6          | 64         | 14         | 38         | 0         | 32         | 0        | 0         | 0        | 3         | 3         | 3         | 38         | 6         |
| Tuscany (Toscana)     | 2019        | 24         | 0         | 21         | 0        | 0         | 0        | 0         | 3         | 3          | 24         | 3          | 23         | 0         | 21         | 0        | 0         | 0        | 0         | 2         | 2         | 23         | 2         |
| Umbria                | 2019        | 12         | 0         | 11         | 0        | 0         | 0        | 1         | 0         | 0          | 12         | 1          | 12         | 0         | 11         | 0        | 0         | 0        | 1         | 0         | 0         | 12         | 1         |
| Marche                | 2019        | 14         | 0         | 13         | 0        | 0         | 0        | 1         | 0         | 0          | 14         | 1          | 14         | 0         | 13         | 0        | 0         | 0        | 1         | 0         | 0         | 14         | 1         |
| Lazio                 | 2019        | 37         | 1         | 29         | 0        | 3         | 0        | 4         | 0         | 4          | 36         | 4          | 25         | 1         | 20         | 0        | 1         | 0        | 3         | 0         | 2         | 24         | 3         |
| Abruzzo               | 2019        | 14         | 0         | 10         | 0        | 1         | 1        | 1         | 1         | 3          | 13         | 3          | 14         | 0         | 10         | 0        | 1         | 1        | 1         | 1         | 3         | 13         | 3         |
| Molise                | 2019        | 7          | 0         | 6          | 0        | 0         | 0        | 0         | 1         | 1          | 7          | 1          | 7          | 0         | 6          | 0        | 0         | 0        | 0         | 1         | 1         | 7          | 1         |
| Campania              | 2019        | 13         | 0         | 7          | 1        | 3         | 0        | 2         | 0         | 3          | 12         | 3          | 13         | 0         | 7          | 1        | 3         | 0        | 2         | 0         | 3         | 12         | 3         |
| Puglia                | 2019        | 27         | 0         | 19         | 0        | 0         | 0        | 4         | 4         | 4          | 27         | 8          | 26         | 0         | 18         | 0        | 0         | 0        | 4         | 4         | 4         | 26         | 8         |
| Basilicata            | 2019        | 15         | 0         | 10         | 0        | 0         | 0        | 5         | 0         | 0          | 15         | 5          | 12         | 0         | 8          | 0        | 0         | 0        | 4         | 0         | 0         | 12         | 4         |
| Calabria              | 2019        | 12         | 0         | 3          | 0        | 0         | 0        | 0         | 9         | 9          | 12         | 9          | 12         | 0         | 3          | 0        | 0         | 0        | 0         | 9         | 9         | 12         | 9         |
| Sicily (Sicilia)      | 2019        | 38         | 14        | 12         | 1        | 2         | 0        | 0         | 9         | 25         | 23         | 10         | 31         | 13        | 10         | 0        | 2         | 0        | 0         | 6         | 21        | 18         | 6         |
| Sardinia (Sardegna)   | 2019        | 19         | 1         | 13         | 0        | 3         | 0        | 2         | 0         | 4          | 18         | 2          | 19         | 1         | 13         | 0        | 3         | 0        | 2         | 0         | 4         | 18         | 2         |
| <b>All Italy</b>      | <b>2019</b> | <b>490</b> | <b>20</b> | <b>371</b> | <b>2</b> | <b>13</b> | <b>2</b> | <b>37</b> | <b>45</b> | <b>80</b>  | <b>466</b> | <b>86</b>  | <b>388</b> | <b>19</b> | <b>290</b> | <b>1</b> | <b>10</b> | <b>2</b> | <b>29</b> | <b>37</b> | <b>68</b> | <b>366</b> | <b>69</b> |
| Piedmont (Piemonte)   | 2020        | 87         | 0         | 68         | 0        | 0         | 0        | 0         | 19        | 19         | 87         | 19         | 63         | 0         | 46         | 0        | 0         | 0        | 0         | 17        | 17        | 63         | 17        |
| Valle d'Aosta         | 2020        | 25         | 0         | 19         | 0        | 0         | 0        | 3         | 3         | 3          | 25         | 6          | 9          | 0         | 8          | 0        | 0         | 0        | 0         | 1         | 1         | 9          | 1         |
| Liguria               | 2020        | 8          | 0         | 8          | 0        | 0         | 0        | 0         | 0         | 0          | 8          | 0          | 6          | 0         | 6          | 0        | 0         | 0        | 0         | 0         | 0         | 6          | 0         |
| Lombardy (Lombardia)  | 2020        | 75         | 0         | 59         | 0        | 0         | 0        | 0         | 16        | 16         | 75         | 16         | 49         | 0         | 40         | 0        | 0         | 0        | 0         | 9         | 9         | 49         | 9         |
| Trentino-Alto Adige   | 2020        | 24         | 0         | 19         | 0        | 0         | 1        | 0         | 4         | 5          | 23         | 5          | 14         | 0         | 11         | 0        | 0         | 0        | 0         | 3         | 3         | 14         | 3         |
| Veneto                | 2020        | 74         | 0         | 71         | 0        | 0         | 0        | 1         | 2         | 2          | 74         | 3          | 31         | 0         | 29         | 0        | 0         | 0        | 1         | 1         | 1         | 31         | 2         |
| Friuli-Venezia Giulia | 2020        | 37         | 0         | 36         | 0        | 0         | 0        | 0         | 1         | 1          | 37         | 1          | 14         | 0         | 13         | 0        | 0         | 0        | 0         | 1         | 1         | 14         | 1         |
| Emilia-Romagna        | 2020        | 193        | 0         | 170        | 0        | 0         | 0        | 7         | 16        | 16         | 193        | 23         | 103        | 0         | 93         | 0        | 0         | 0        | 3         | 7         | 7         | 103        | 10        |
| Tuscany (Toscana)     | 2020        | 28         | 0         | 23         | 0        | 0         | 0        | 0         | 5         | 5          | 28         | 5          | 27         | 0         | 22         | 0        | 0         | 0        | 0         | 5         | 5         | 27         | 5         |
| Umbria                | 2020        | 9          | 0         | 7          | 0        | 0         | 0        | 2         | 0         | 0          | 9          | 2          | 9          | 0         | 7          | 0        | 0         | 0        | 2         | 0         | 0         | 9          | 2         |
| Marche                | 2020        | 16         | 0         | 16         | 0        | 0         | 0        | 0         | 0         | 0          | 16         | 0          | 16         | 0         | 16         | 0        | 0         | 0        | 0         | 0         | 0         | 16         | 0         |
| Lazio                 | 2020        | 21         | 0         | 11         | 0        | 0         | 0        | 10        | 0         | 0          | 21         | 10         | 20         | 0         | 11         | 0        | 0         | 0        | 9         | 0         | 0         | 20         | 9         |
| Abruzzo               | 2020        | 15         | 0         | 10         | 1        | 4         | 0        | 0         | 0         | 4          | 14         | 1          | 14         | 0         | 9          | 1        | 4         | 0        | 0         | 0         | 4         | 13         | 1         |
| Molise                | 2020        | 16         | 1         | 12         | 0        | 0         | 0        | 2         | 1         | 2          | 15         | 3          | 13         | 1         | 10         | 0        | 0         | 0        | 2         | 0         | 1         | 12         | 2         |
| Campania              | 2020        | 19         | 1         | 13         | 0        | 1         | 0        | 4         | 0         | 2          | 18         | 4          | 18         | 1         | 12         | 0        | 1         | 0        | 4         | 0         | 2         | 17         | 4         |
| Puglia                | 2020        | 22         | 0         | 15         | 0        | 0         | 0        | 2         | 5         | 5          | 22         | 7          | 21         | 0         | 14         | 0        | 0         | 0        | 2         | 5         | 5         | 21         | 7         |
| Basilicata            | 2020        | 14         | 0         | 9          | 0        | 0         | 0        | 5         | 0         | 0          | 14         | 5          | 13         | 0         | 9          | 0        | 0         | 0        | 4         | 0         | 0         | 13         | 4         |
| Calabria              | 2020        | 16         | 0         | 8          | 0        | 1         | 0        | 2         | 5         | 6          | 16         | 7          | 16         | 0         | 8          | 0        | 1         | 0        | 2         | 5         | 6         | 16         | 7         |
| Sicily (Sicilia)      | 2020        | 29         | 6         | 14         | 0        | 9         | 0        | 0         | 0         | 15         | 23         | 0          | 23         | 6         | 10         | 0        | 7         | 0        | 0         | 0         | 13        | 17         | 0         |
| Sardinia (Sardegna)   | 2020        | 21         | 0         | 20         | 0        | 1         | 0        | 0         | 0         | 1          | 21         | 0          | 20         | 0         | 19         | 0        | 1         | 0        | 0         | 0         | 1         | 20         | 0         |
| <b>All Italy</b>      | <b>2020</b> | <b>749</b> | <b>8</b>  | <b>608</b> | <b>1</b> | <b>16</b> | <b>1</b> | <b>38</b> | <b>77</b> | <b>102</b> | <b>739</b> | <b>117</b> | <b>499</b> | <b>8</b>  | <b>393</b> | <b>1</b> | <b>14</b> | <b>0</b> | <b>29</b> | <b>54</b> | <b>76</b> | <b>490</b> | <b>84</b> |
| Piedmont (Piemonte)   | 2021        | 49         | 0         | 31         | 0        | 0         | 1        | 0         | 17        | 18         | 48         | 18         | 39         | 0         | 27         | 0        | 0         | 1        | 0         | 11        | 39        | 12         | 11        |
| Valle d'Aosta         | 2021        | 11         | 0         | 9          | 0        | 0         | 0        | 0         | 2         | 2          | 11         | 2          | 3          | 0         | 3          | 0        | 0         | 0        | 0         | 0         | 3         | 0          | 0         |
| Liguria               | 2021        | 11         | 0         | 9          | 0        | 0         | 1        | 0         | 1         | 2          | 10         | 2          | 10         | 0         | 8          | 0        | 0         | 1        | 0         | 1         | 10        | 2          | 1         |
| Lombardy (Lombardia)  | 2021        | 70         | 0         | 48         | 0        | 0         | 1        | 0         | 21        | 22         | 69         | 22         | 57         | 0         | 39         | 0        | 0         | 1        | 0         | 17        | 57        | 18         | 17        |
| Trentino-Alto Adige   | 2021        | 14         | 1         | 11         | 0        | 0         | 0        | 0         | 2         | 3          | 13         | 2          | 11         | 1         | 8          | 0        | 0         | 0        | 0         | 2         | 10        | 2          | 2         |
| Veneto                | 2021        | 51         | 0         | 50         | 0        | 0         | 0        | 0         | 1         | 1          | 51         | 1          | 24         | 0         | 23         | 0        | 0         | 0        | 0         | 1         | 24        | 1          | 1         |
| Friuli-Venezia Giulia | 2021        | 26         | 0         | 26         | 0        | 0         | 0        | 0         | 0         | 0          | 26         | 0          | 12         | 0         | 12         | 0        | 0         | 0        | 0         | 0         | 12        | 0          | 0         |
| Emilia-Romagna        | 2021        | 120        | 0         | 114        | 0        | 0         | 0        | 5         | 1         | 1          | 120        | 6          | 67         | 0         | 66         | 0        | 0         | 0        | 1         | 0         | 66        | 1          | 1         |
| Tuscany (Toscana)     | 2021        | 20         | 0         | 17         | 0        | 0         | 0        | 0         | 3         | 3          | 20         | 3          | 18         | 0         | 15         | 0        | 0         | 0        | 0         | 3         | 18        | 3          | 3         |
| Umbria                | 2021        | 5          | 0         | 4          | 0        | 0         | 0        | 1         | 0         | 0          | 5          | 1          | 5          | 0         | 4          | 0        | 0         | 0        | 1         | 0         | 4         | 1          | 1         |
| Marche                | 2021        | 23         | 0         | 15         | 0        | 1         | 0        | 6         | 1         | 2          | 23         | 7          | 20         | 0         | 14         | 0        | 1         | 0        | 4         | 1         | 15        | 5          | 6         |
| Lazio                 | 2021        | 26         | 0         | 10         | 0        | 0         | 0        | 0         | 16        | 16         | 26         | 16         | 22         | 0         | 9          | 0        | 0         | 0        | 0         | 13        | 22        | 13         | 13        |
| Abruzzo               | 2021        | 17         | 0         | 9          | 0        | 0         | 0        | 0         | 8         | 8          | 17         | 8          | 13         | 0         | 8          | 0        | 0         | 0        | 0         | 5         | 13        | 5          | 5         |
| Molise                | 2021        | 10         | 0         | 7          | 0        | 0         | 0        | 0         | 3         | 3          | 10         | 3          | 10         | 0         | 7          | 0        | 0         | 0        | 0         | 3         | 10        | 3          | 3         |
| Campania              | 2021        | 15         | 0         | 7          | 0        | 0         | 0        | 0         | 8         | 8          | 15         | 8          | 14         | 0         | 7          | 0        | 0         | 0        | 0         | 7         | 14        | 7          | 7         |
| Puglia                | 2021        | 27         | 0         | 22         | 0        | 0         | 0        | 2         | 3         | 3          | 27         | 5          | 26         | 0         | 21         | 0        | 0         | 0        | 2         | 3         | 24        | 5          | 5         |
| Basilicata            | 2021        | 15         | 0         | 7          | 0        | 0         | 2        | 0         | 6         | 8          | 13         | 8          | 12         | 0         | 5          | 0        | 0         | 2        | 0         | 5         | 12        | 7          | 5         |
| Calabria              | 2021        | 15         | 0         | 7          | 0        | 0         | 0        | 0         | 8         | 8          | 15         | 8          | 10         | 0         | 5          | 0        | 0         | 0        | 0         | 5         | 10        | 5          | 5         |
| Sicily (Sicilia)      | 2021        | 13         | 7         | 3          | 0        | 3         | 0        | 0         | 0         | 10         | 6          | 0          | 12         | 6         | 3          | 0        | 3         | 0        | 0         | 0         | 3         | 0          | 3         |

|                       |             |            |           |            |          |           |          |           |            |            |            |            |            |           |            |          |           |          |           |            |            |            |            |
|-----------------------|-------------|------------|-----------|------------|----------|-----------|----------|-----------|------------|------------|------------|------------|------------|-----------|------------|----------|-----------|----------|-----------|------------|------------|------------|------------|
| Sardinia (Sardegna)   | 2021        | 29         | 0         | 28         | 0        | 1         | 0        | 0         | 0          | 1          | 29         | 0          | 21         | 0         | 0          | 0        | 0         | 0        | 0         | 21         | 0          | 0          |            |
| <b>All Italy</b>      | <b>2021</b> | <b>567</b> | <b>8</b>  | <b>434</b> | <b>0</b> | <b>5</b>  | <b>5</b> | <b>14</b> | <b>101</b> | <b>119</b> | <b>554</b> | <b>120</b> | <b>406</b> | <b>7</b>  | <b>305</b> | <b>0</b> | <b>4</b>  | <b>5</b> | <b>8</b>  | <b>77</b>  | <b>387</b> | <b>90</b>  | <b>89</b>  |
| Piedmont (Piemonte)   | 2022        | 70         | 3         | 45         | 0        | 15        | 0        | 7         | 0          | 18         | 67         | 7          | 62         | 2         | 41         | 0        | 13        | 0        | 6         | 0          | 15         | 60         | 6          |
| Valle d'Aosta         | 2022        | 14         | 0         | 12         | 0        | 2         | 0        | 0         | 0          | 2          | 14         | 0          | 7          | 0         | 6          | 0        | 1         | 0        | 0         | 0          | 1          | 7          | 0          |
| Liguria               | 2022        | 14         | 1         | 10         | 0        | 0         | 0        | 3         | 0          | 1          | 13         | 3          | 8          | 1         | 6          | 0        | 0         | 0        | 1         | 0          | 1          | 7          | 1          |
| Lombardy (Lombardia)  | 2022        | 69         | 2         | 56         | 0        | 6         | 0        | 4         | 1          | 9          | 67         | 5          | 55         | 2         | 43         | 0        | 5         | 0        | 4         | 1          | 8          | 53         | 5          |
| Trentino-Alto Adige   | 2022        | 30         | 0         | 29         | 0        | 0         | 0        | 1         | 0          | 0          | 30         | 1          | 25         | 0         | 24         | 0        | 0         | 0        | 1         | 0          | 0          | 25         | 1          |
| Veneto                | 2022        | 43         | 1         | 32         | 0        | 1         | 0        | 9         | 0          | 2          | 42         | 9          | 38         | 1         | 30         | 0        | 1         | 0        | 6         | 0          | 2          | 37         | 6          |
| Friuli-Venezia Giulia | 2022        | 17         | 1         | 12         | 0        | 3         | 0        | 1         | 0          | 4          | 16         | 1          | 9          | 1         | 6          | 0        | 1         | 0        | 1         | 0          | 2          | 8          | 1          |
| Emilia-Romagna        | 2022        | 263        | 0         | 258        | 0        | 3         | 0        | 2         | 0          | 3          | 263        | 2          | 130        | 0         | 128        | 0        | 1         | 0        | 1         | 0          | 1          | 130        | 1          |
| Tuscany (Toscana)     | 2022        | 40         | 1         | 30         | 0        | 2         | 0        | 7         | 0          | 3          | 39         | 7          | 35         | 1         | 26         | 0        | 2         | 0        | 6         | 0          | 3          | 34         | 6          |
| Umbria                | 2022        | 5          | 0         | 4          | 0        | 0         | 0        | 0         | 1          | 1          | 5          | 1          | 4          | 0         | 3          | 0        | 0         | 0        | 0         | 1          | 1          | 4          | 1          |
| Marche                | 2022        | 10         | 0         | 8          | 0        | 0         | 0        | 0         | 2          | 2          | 10         | 2          | 10         | 0         | 8          | 0        | 0         | 0        | 0         | 2          | 2          | 10         | 2          |
| Lazio                 | 2022        | 21         | 0         | 10         | 0        | 0         | 1        | 0         | 10         | 11         | 20         | 11         | 19         | 0         | 10         | 0        | 0         | 1        | 0         | 8          | 9          | 18         | 9          |
| Abruzzo               | 2022        | 19         | 0         | 9          | 0        | 0         | 0        | 0         | 10         | 10         | 19         | 10         | 17         | 0         | 9          | 0        | 0         | 0        | 0         | 8          | 8          | 17         | 8          |
| Molise                | 2022        | 12         | 0         | 6          | 0        | 0         | 1        | 0         | 5          | 6          | 11         | 6          | 11         | 0         | 5          | 0        | 0         | 1        | 0         | 5          | 6          | 10         | 6          |
| Campania              | 2022        | 19         | 0         | 13         | 0        | 0         | 0        | 0         | 6          | 6          | 19         | 6          | 17         | 0         | 12         | 0        | 0         | 0        | 0         | 5          | 5          | 17         | 5          |
| Puglia                | 2022        | 28         | 0         | 13         | 0        | 0         | 0        | 0         | 15         | 15         | 28         | 15         | 23         | 0         | 10         | 0        | 0         | 0        | 0         | 13         | 13         | 23         | 13         |
| Basilicata            | 2022        | 18         | 0         | 9          | 0        | 0         | 1        | 0         | 8          | 9          | 17         | 9          | 17         | 0         | 8          | 0        | 0         | 1        | 0         | 8          | 9          | 16         | 9          |
| Calabria              | 2022        | 22         | 0         | 10         | 0        | 0         | 2        | 0         | 10         | 12         | 20         | 12         | 21         | 0         | 10         | 0        | 0         | 2        | 0         | 9          | 11         | 19         | 11         |
| Sicily (Sicilia)      | 2022        | 47         | 29        | 11         | 0        | 7         | 0        | 0         | 0          | 36         | 18         | 0          | 36         | 23        | 7          | 0        | 6         | 0        | 0         | 0          | 29         | 13         | 0          |
| Sardinia (Sardegna)   | 2022        | 21         | 0         | 11         | 0        | 0         | 0        | 0         | 10         | 10         | 21         | 10         | 20         | 0         | 10         | 0        | 0         | 0        | 0         | 10         | 10         | 20         | 10         |
| <b>All Italy</b>      | <b>2022</b> | <b>782</b> | <b>38</b> | <b>588</b> | <b>0</b> | <b>39</b> | <b>5</b> | <b>34</b> | <b>78</b>  | <b>160</b> | <b>739</b> | <b>117</b> | <b>564</b> | <b>31</b> | <b>402</b> | <b>0</b> | <b>30</b> | <b>5</b> | <b>26</b> | <b>70</b>  | <b>136</b> | <b>528</b> | <b>101</b> |
| Piedmont (Piemonte)   | 2023        | 77         | 0         | 53         | 0        | 0         | 0        | 2         | 22         | 22         | 77         | 24         | 24         | 0         | 39         | 0        | 0         | 0        | 2         | 15         | 15         | 56         | 17         |
| Valle d'Aosta         | 2023        | 11         | 0         | 10         | 0        | 1         | 0        | 0         | 0          | 1          | 11         | 0          | 0          | 0         | 8          | 0        | 1         | 0        | 0         | 0          | 1          | 9          | 0          |
| Liguria               | 2023        | 14         | 0         | 13         | 0        | 0         | 0        | 0         | 1          | 1          | 14         | 1          | 1          | 0         | 10         | 0        | 0         | 0        | 0         | 1          | 1          | 11         | 1          |
| Lombardy (Lombardia)  | 2023        | 67         | 0         | 48         | 0        | 0         | 0        | 3         | 16         | 16         | 67         | 19         | 19         | 0         | 36         | 0        | 0         | 0        | 2         | 14         | 14         | 52         | 16         |
| Trentino-Alto Adige   | 2023        | 33         | 0         | 33         | 0        | 0         | 0        | 0         | 0          | 0          | 33         | 0          | 0          | 0         | 26         | 0        | 0         | 0        | 0         | 0          | 0          | 26         | 0          |
| Veneto                | 2023        | 36         | 0         | 33         | 1        | 0         | 0        | 0         | 2          | 2          | 35         | 3          | 3          | 0         | 24         | 1        | 0         | 0        | 0         | 1          | 1          | 25         | 2          |
| Friuli-Venezia Giulia | 2023        | 20         | 0         | 17         | 0        | 0         | 1        | 1         | 1          | 2          | 19         | 3          | 3          | 0         | 14         | 0        | 0         | 1        | 1         | 0          | 1          | 15         | 2          |
| Emilia-Romagna        | 2023        | 132        | 0         | 114        | 0        | 3         | 0        | 5         | 10         | 13         | 132        | 15         | 15         | 0         | 65         | 0        | 1         | 0        | 3         | 5          | 6          | 74         | 8          |
| Tuscany (Toscana)     | 2023        | 37         | 0         | 29         | 0        | 0         | 0        | 4         | 4          | 4          | 37         | 8          | 8          | 0         | 15         | 0        | 0         | 0        | 3         | 3          | 3          | 21         | 6          |
| Umbria                | 2023        | 20         | 0         | 14         | 0        | 0         | 0        | 4         | 2          | 2          | 20         | 6          | 6          | 0         | 8          | 0        | 0         | 0        | 2         | 1          | 1          | 11         | 3          |
| Marche                | 2023        | 42         | 0         | 39         | 0        | 1         | 0        | 1         | 1          | 2          | 42         | 2          | 2          | 0         | 18         | 0        | 1         | 0        | 1         | 1          | 2          | 21         | 2          |
| Lazio                 | 2023        | 36         | 0         | 22         | 1        | 0         | 0        | 3         | 10         | 10         | 35         | 14         | 14         | 0         | 11         | 1        | 0         | 0        | 3         | 7          | 7          | 21         | 11         |
| Abruzzo               | 2023        | 70         | 0         | 42         | 2        | 2         | 0        | 7         | 17         | 19         | 68         | 26         | 26         | 0         | 22         | 1        | 2         | 0        | 4         | 10         | 12         | 38         | 15         |
| Molise                | 2023        | 31         | 0         | 19         | 0        | 1         | 0        | 5         | 6          | 7          | 31         | 11         | 11         | 0         | 11         | 0        | 0         | 0        | 3         | 4          | 4          | 18         | 7          |
| Campania              | 2023        | 38         | 0         | 26         | 0        | 1         | 0        | 0         | 11         | 12         | 38         | 11         | 11         | 0         | 16         | 0        | 1         | 0        | 0         | 7          | 8          | 24         | 7          |
| Puglia                | 2023        | 84         | 0         | 44         | 0        | 0         | 0        | 6         | 34         | 34         | 84         | 40         | 40         | 0         | 24         | 0        | 0         | 0        | 2         | 15         | 15         | 41         | 17         |
| Basilicata            | 2023        | 41         | 0         | 21         | 0        | 0         | 0        | 4         | 16         | 16         | 41         | 20         | 20         | 0         | 11         | 0        | 0         | 0        | 4         | 10         | 10         | 25         | 14         |
| Calabria              | 2023        | 16         | 0         | 11         | 0        | 1         | 0        | 3         | 1          | 2          | 16         | 4          | 4          | 0         | 6          | 0        | 1         | 0        | 2         | 1          | 2          | 10         | 3          |
| Sicily (Sicilia)      | 2023        | 32         | 7         | 6          | 0        | 0         | 1        | 5         | 13         | 21         | 24         | 19         | 19         | 5         | 4          | 0        | 0         | 1        | 5         | 11         | 17         | 20         | 17         |
| Sardinia (Sardegna)   | 2023        | 93         | 1         | 81         | 0        | 0         | 0        | 6         | 5          | 6          | 92         | 11         | 11         | 0         | 38         | 0        | 0         | 0        | 2         | 2          | 2          | 42         | 4          |
| <b>All Italy</b>      | <b>2023</b> | <b>930</b> | <b>8</b>  | <b>675</b> | <b>4</b> | <b>10</b> | <b>2</b> | <b>59</b> | <b>172</b> | <b>192</b> | <b>916</b> | <b>237</b> | <b>237</b> | <b>5</b>  | <b>406</b> | <b>3</b> | <b>7</b>  | <b>2</b> | <b>39</b> | <b>108</b> | <b>122</b> | <b>560</b> | <b>152</b> |

<sup>1</sup> The 20 Italian regions are listed by the following geographic zones: North (Piedmont, Valle d'Aosta, Liguria, Lombardy, Trentino-Alto Adige, Veneto, Friuli-Venezia Giulia, Emilia-Romagna), Central (Tuscany, Marche, Umbria, Lazio, Abruzzo), South (Molise, Campania, Puglia, Basilicata, Calabria) and the two islands (Sicily and Sardinia). The Italian name of some regions is provided in parentheses.

<sup>2</sup> Years of production.

<sup>3</sup> Total number of samples analysed.

<sup>4</sup> The number of unique honey samples within the same year of production: this number refers to different beekeepers who provided samples in the year of production considered.

**Supplementary Table 2.** Results of the logistic regression analyses testing the effect of latitude on the distribution of honey samples including some lineages or lineage combinations (various mtDNA lineage profiles or patterns) in the 2018-2023 period or in single years.

| Lineages <sup>1</sup> | Years     | Macro-regions      | Latitude <sup>2</sup>   | Chi-Square <sup>3</sup> |
|-----------------------|-----------|--------------------|-------------------------|-------------------------|
| Including A           | 2018-2023 | Peninsula + Sicily | -0.280 (0.017); <0.0001 | 287.81; <0.0001         |
|                       |           | Peninsula          | -0.222 (0.021); <0.0001 | 112.45; <0.0001         |
|                       | 2018      | Peninsula + Sicily | -0.103 (0.044); 0.0192  | 5.41; 0.0201            |
|                       |           | Peninsula          | -0.027 (0.050); 0.5909  | 0.29; 0.5927            |
|                       | 2019      | Peninsula + Sicily | -0.361 (0.049); <0.0001 | 59.56; <0.0001          |
|                       |           | Peninsula          | -0.273 (0.069); 0.0001  | 15.72; 0.0001           |
|                       | 2020      | Peninsula + Sicily | -0.173 (0.043); 0.0001  | 15.16; 0.0001           |
|                       |           | Peninsula          | -0.032 (0.067); 0.639   | 0.22; 0.642             |
|                       | 2021      | Peninsula + Sicily | -0.306 (0.047); <0.0001 | 43.99; <0.0001          |
|                       |           | Peninsula          | -0.279 (0.053); <0.0001 | 27.70; <0.0001          |
|                       | 2022      | Peninsula + Sicily | -0.469 (0.041); <0.0001 | 161.00; <0.0001         |
|                       |           | Peninsula          | -0.474 (0.053); <0.0001 | 86.52; <0.0001          |
|                       | 2023      | Peninsula + Sicily | -0.262 (0.037); <0.0001 | 52.31; <0.0001          |
|                       |           | Peninsula          | -0.228 (0.044); <0.0001 | 27.74; <0.0001          |
| Including M           | 2018-2023 | Peninsula + Sicily | -0.183 (0.016); <0.0001 | 130.10; <0.0001         |
|                       |           | Peninsula          | -0.266 (0.019); <0.0001 | 188.27; <0.0001         |
|                       | 2018      | Peninsula + Sicily | -0.091 (0.039); 0.021   | 5.32; 0.021             |
|                       |           | Peninsula          | -0.081 (0.042); 0.053   | 3.69; 0.055             |
|                       | 2019      | Peninsula + Sicily | -0.182 (0.044); <0.0001 | 17.06; <0.0001          |
|                       |           | Peninsula          | -0.258 (0.060); <0.0001 | 18.66; <0.0001          |
|                       | 2020      | Peninsula + Sicily | -0.062 (0.044); 0.156   | 1.93; 0.165             |
|                       |           | Peninsula          | -0.207 (0.055); 0.0002  | 13.50; 0.0002           |
|                       | 2021      | Peninsula + Sicily | -0.192 (0.046); <0.0001 | 17.52; <0.0001          |
|                       |           | Peninsula          | -0.290 (0.052); <0.0001 | 31.70; <0.0001          |
|                       | 2022      | Peninsula + Sicily | -0.248 (0.038); <0.0001 | 40.09; <0.0001          |
|                       |           | Peninsula          | -0.548 (0.056); <0.0001 | 109.33; <0.0001         |
|                       | 2023      | Peninsula + Sicily | -0.257 (0.035); <0.0001 | 56.26; <0.0001          |
|                       |           | Peninsula          | -0.260 (0.041); <0.0001 | 41.49; <0.0001          |
| Only C                | 2018-2023 | Peninsula + Sicily | 0.277 (0.016); <0.0001  | 328.92; <0.0001         |
|                       |           | Peninsula          | 0.242 (0.019); <0.0001  | 165.34; <0.0001         |
|                       | 2018      | Peninsula + Sicily | 0.123 (0.038); 0.0011   | 10.70; 0.0011           |
|                       |           | Peninsula          | 0.063 (0.041); 0.121    | 2.33; 0.123             |
|                       | 2019      | Peninsula + Sicily | 0.306 (0.043); <0.0001  | 55.19; <0.0001          |
|                       |           | Peninsula          | 0.274 (0.057); <0.0001  | 23.54; <0.0001          |
|                       | 2020      | Peninsula + Sicily | 0.238 (0.039); <0.0001  | 35.89; <0.0001          |
|                       |           | Peninsula          | 0.247 (0.054); <0.0001  | 20.51; <0.0001          |
|                       | 2021      | Peninsula + Sicily | 0.303 (0.046); <0.0001  | 45.43; <0.0001          |
|                       |           | Peninsula          | 0.283 (0.052); <0.0001  | 30.65; <0.0001          |
|                       | 2022      | Peninsula + Sicily | 0.366 (0.037); <0.0001  | 112.09; <0.0001         |
|                       |           | Peninsula          | 0.343 (0.047); <0.0001  | 53.05; <0.0001          |
|                       | 2023      | Peninsula + Sicily | 0.302 (0.036); <0.0001  | 78.68; <0.0001          |
|                       |           | Peninsula          | 0.266 (0.041); <0.0001  | 44.50; <0.0001          |

<sup>1</sup> Dependent variables were based on honey samples with the following mtDNA lineages or lineage patterns: all honey samples including the A lineage, all honey samples including the M lineage, only C lineage in the honey. The used lineage information was from honey samples produced in all regions of the Italian Peninsula and Sicily. <sup>2</sup> X<sub>1</sub> variable: values indicate regression coefficients, their standard errors (in brackets) and the *P*-values. <sup>3</sup> Values of the Chi-square and the probability of the test in the model.

**Supplementary Table S3.** Results of the logistic regression analyses testing the effect of latitude, including Sardinia, on the distribution of honey samples including some mtDNA lineages or lineage combinations (various mtDNA lineage profiles or patterns) in the 2018-2023 period or in single years.

| Lineages <sup>1</sup> | Years     | Macro-regions                 | Latitude <sup>2</sup>   | Chi-Square <sup>3</sup> |
|-----------------------|-----------|-------------------------------|-------------------------|-------------------------|
| A                     | 2018-2023 | Peninsula + Sardinia + Sicily | -0.246 (0.016); <0.0001 | 242.97; <0.0001         |
|                       |           | Peninsula + Sardinia          | -0.178 (0.019); <0.0001 | 84.80; <0.0001          |
|                       | 2018      | Peninsula + Sardinia + Sicily | -0.101 (0.042); 0.0168  | 5.61; 0.0178            |
|                       |           | Peninsula + Sardinia          | -0.027 (0.048); 0.5785  | 0.31; 0.5805            |
|                       | 2019      | Peninsula + Sardinia + Sicily | -0.350 (0.048); <0.0001 | 59.82; <0.0001          |
|                       |           | Peninsula + Sardinia          | -0.251 (0.064); 0.0001  | 15.59; 0.0001           |
|                       | 2020      | Peninsula + Sardinia + Sicily | -0.148 (0.042); 0.0004  | 11.60; 0.0007           |
|                       |           | Peninsula + Sardinia          | 0.002 (0.063); 0.9783   | 0.01; 0.9783            |
|                       | 2021      | Peninsula + Sardinia + Sicily | -0.229 (0.043); <0.0001 | 28.20; <0.0001          |
|                       |           | Peninsula + Sardinia          | -0.185 (0.048); 0.0001  | 14.61; 0.0001           |
|                       | 2022      | Peninsula + Sardinia + Sicily | -0.466 (0.034); <0.0001 | 169.56; <0.0001         |
|                       |           | Peninsula + Sardinia          | -0.467 (0.049); <0.0001 | 98.12; <0.0001          |
|                       | 2023      | Peninsula + Sardinia + Sicily | -0.018 (0.034); <0.0001 | 28.07; <0.0001          |
|                       |           | Peninsula + Sardinia          | -0.120 (0.039); 0.0020  | 9.66; 0.0019            |
| M                     | 2018-2023 | Peninsula + Sardinia + Sicily | -0.156 (0.015); <0.0001 | 102.27; <0.0001         |
|                       |           | Peninsula + Sardinia          | -0.209 (0.018); <0.0001 | 136.64; <0.0001         |
|                       | 2018      | Peninsula + Sardinia + Sicily | -0.088 (0.038); 0.019   | 5.43; 0.0191            |
|                       |           | Peninsula + Sardinia          | -0.078 (0.040); 0.052   | 3.72; 0.054             |
|                       | 2019      | Peninsula + Sardinia + Sicily | -0.169 (0.043); 0.0001  | 15.02; 0.0001           |
|                       |           | Peninsula + Sardinia          | -0.216 (0.056); 0.0001  | 14.74; 0.0001           |
|                       | 2020      | Peninsula + Sardinia + Sicily | -0.032 (0.044); 0.4595  | 0.53; 0.4644            |
|                       |           | Peninsula + Sardinia          | -0.136 (0.052); 0.008   | 6.69; 0.0097            |
|                       | 2021      | Peninsula + Sardinia + Sicily | -0.122 (0.043); 0.0045  | 7.90; 0.0049            |
|                       |           | Peninsula + Sardinia          | -0.180 (0.046); 0.0001  | 14.76; 0.0001           |
|                       | 2022      | Peninsula + Sardinia + Sicily | -0.265 (0.037); <0.0001 | 50.10; <0.0001          |
|                       |           | Peninsula + Sardinia          | -0.535 (0.052); <0.0001 | 121.58; <0.0001         |
|                       | 2023      | Peninsula + Sardinia + Sicily | -0.177 (0.032); <0.0001 | 31.45; <0.0001          |
|                       |           | Peninsula + Sardinia          | -0.150 (0.036); <0.0001 | 17.88; <0.0001          |
| C                     | 2018-2023 | Peninsula + Sardinia + Sicily | 0.239 (0.015); <0.0001  | 270.40; <0.0001         |
|                       |           | Peninsula + Sardinia          | 0.191 (0.017); <0.0001  | 121.74; <0.0001         |
|                       | 2018      | Peninsula + Sardinia + Sicily | 0.118 (0.036); 0.0011   | 10.64; 0.0011           |
|                       |           | Peninsula + Sardinia          | 0.060 (0.040); 0.1310   | 2.25; 0.1334            |
|                       | 2019      | Peninsula + Sardinia + Sicily | 0.293 (0.042); <0.0001  | 53.50; <0.0001          |
|                       |           | Peninsula + Sardinia          | 0.255 (0.053); <0.0001  | 23.60; <0.0001          |
|                       | 2020      | Peninsula + Sardinia + Sicily | 0.203 (0.038); <0.0001  | 27.92; <0.0001          |
|                       |           | Peninsula + Sardinia          | 0.179 (0.049); 0.0003   | 12.55; 0.0004           |
|                       | 2021      | Peninsula + Sardinia + Sicily | 0.221 (0.042); <0.0001  | 28.04; <0.0001          |
|                       |           | Peninsula + Sardinia          | 0.184 (0.046); 0.0001   | 15.59; 0.0001           |
|                       | 2022      | Peninsula + Sardinia + Sicily | 0.362 (0.035); <0.0001  | 117.80; <0.0001         |
|                       |           | Peninsula + Sardinia          | 0.341 (0.044); <0.0001  | 60.89; <0.0001          |
|                       | 2023      | Peninsula + Sardinia + Sicily | 0.211 (0.032); <0.0001  | 46.36; <0.0001          |
|                       |           | Peninsula + Sardinia          | 0.155 (0.035); <0.0001  | 19.82; <0.0001          |

<sup>1</sup> Dependent variable were based on honey samples with the following mitotype lineages or mitotype patterns: only C lineage in the honey, all honey samples including the A lineage, all honey samples including the M lineage. The used mitotype information was from honey samples produced in all regions of the Italian peninsula and Sicily. <sup>2</sup> X<sub>1</sub> variable: values indicate regression coefficients, their standard errors (in brackets) and the P-values. <sup>3</sup> Values of the Chi-square and the probability of the test in the model.

**Supplementary Table S4.** Results of the logistic regression analyses testing the effect of longitude on the distribution of honey samples in the North of Italy including some mtDNA lineages or lineage combinations (patterns or profiles) in the 2018-2023 period or in single years.

| <b>Lineages</b> <sup>1</sup> | <b>Years</b> | <b>Longitude</b> <sup>2</sup> | <b>Chi-Square</b> <sup>3</sup> |
|------------------------------|--------------|-------------------------------|--------------------------------|
| Including A                  | 2018-2023    | -0.324 (0.040); <0.0001       | 68.73; <0.0001                 |
|                              | 2018         | -0.079 (0.093); 0.396         | 0.72; 0.396                    |
|                              | 2019         | -0.280 (0.117); 0.017         | 6.06; 0.014                    |
|                              | 2020         | -0.302 (0.082); 0.0002        | 13.74; 0.0002                  |
|                              | 2021         | -0.606 (0.108); <0.0001       | 37.09; <0.0001                 |
|                              | 2022         | -0.424 (0.113); 0.0002        | 14.25; 0.0002                  |
|                              | 2023         | -0.331 (0.092); 0.0003        | 13.47; 0.0002                  |
| Including M                  | 2018-2023    | -0.202 (0.036); <0.0001       | 31.47; <0.0001                 |
|                              | 2018         | 0.046 (0.077); 0.552          | 0.35; 0.552                    |
|                              | 2019         | -0.075 (0.094); 0.421         | 0.65; 0.421                    |
|                              | 2020         | -0.265 (0.076); 0.0005        | 12.16; 0.0005                  |
|                              | 2021         | -0.533 (0.101); <0.0001       | 31.55; <0.0001                 |
|                              | 2022         | -0.183 (0.131); 0.162         | 1.92; 0.166                    |
|                              | 2023         | -0.307 (0.087); 0.0004        | 13.00; 0.0003                  |
| Only C                       | 2018-2023    | 0.216 (0.341); <0.0001        | 40.778 <0.0001                 |
|                              | 2018         | -0.069 (0.075); 0.356         | 0.85; 0.355                    |
|                              | 2019         | 0.130 (0.089); 0.146          | 2.13; 0.144                    |
|                              | 2020         | 0.265 (0.076); 0.0005         | 12.16; 0.0005                  |
|                              | 2021         | 0.510 (0.099); <0.0001        | 29.58; <0.0001                 |
|                              | 2022         | 0.348 (0.090); 0.0001         | 14.95; 0.0001                  |
|                              | 2023         | 0.286 (0.085); 0.0007         | 11.86; 0.0006                  |

<sup>1</sup> Dependent variable were based on honey samples with the following mtDNA lineages or lineage patterns: all honey samples including the A lineage, all honey samples including the M lineage or only the C lineage in the honey. <sup>2</sup> X<sub>1</sub> variable: values indicate regression coefficients, their standard errors (in brackets) and the *P*-values. <sup>3</sup> Values of the Chi-square and the probability of the test in the model.

**Supplementary Table S5.** P-values of the logistic regression conducted over years for the various mtDNA lineage profiles (honey samples containing the A lineage; honey samples containing the M lineage; honey samples with only the C lineage), considering macro-regions.

| <b>Macro-regions</b> | <b>A</b> | <b>M</b> | <b>Only C</b> |
|----------------------|----------|----------|---------------|
| North                | 0.788    | 0.00022  | 0.013         |
| Central + South      | 0.000002 | 0.00008  | 0.00079       |

**Supplementary Table S6.** List of beekeepers who provided honey samples across years (2018-2023).

| <b>Region</b> | <b>Beekeeper ID</b> | <b>No. of honey samples submitted</b> | <b>No. of years of submission of honey samples</b> |
|---------------|---------------------|---------------------------------------|----------------------------------------------------|
| Abruzzo       | 35                  | 2                                     | 1                                                  |
| Abruzzo       | 62                  | 3                                     | 2                                                  |
| Abruzzo       | 66                  | 1                                     | 1                                                  |
| Abruzzo       | 87                  | 2                                     | 1                                                  |
| Abruzzo       | 90                  | 1                                     | 1                                                  |
| Abruzzo       | 108                 | 5                                     | 4                                                  |
| Abruzzo       | 113                 | 4                                     | 2                                                  |
| Abruzzo       | 146                 | 5                                     | 4                                                  |
| Abruzzo       | 171                 | 3                                     | 2                                                  |
| Abruzzo       | 179                 | 5                                     | 3                                                  |
| Abruzzo       | 182                 | 1                                     | 1                                                  |
| Abruzzo       | 193                 | 1                                     | 1                                                  |
| Abruzzo       | 203                 | 1                                     | 1                                                  |
| Abruzzo       | 207                 | 6                                     | 4                                                  |
| Abruzzo       | 218                 | 2                                     | 1                                                  |
| Abruzzo       | 219                 | 2                                     | 2                                                  |
| Abruzzo       | 223                 | 2                                     | 1                                                  |
| Abruzzo       | 241                 | 1                                     | 1                                                  |
| Abruzzo       | 264                 | 1                                     | 1                                                  |
| Abruzzo       | 271                 | 2                                     | 1                                                  |
| Abruzzo       | 278                 | 1                                     | 1                                                  |
| Abruzzo       | 294                 | 8                                     | 5                                                  |
| Abruzzo       | 304                 | 1                                     | 1                                                  |
| Abruzzo       | 307                 | 5                                     | 4                                                  |
| Abruzzo       | 317                 | 2                                     | 2                                                  |
| Abruzzo       | 321                 | 1                                     | 1                                                  |
| Abruzzo       | 348                 | 1                                     | 1                                                  |
| Abruzzo       | 357                 | 2                                     | 2                                                  |
| Abruzzo       | 410                 | 1                                     | 1                                                  |
| Abruzzo       | 434                 | 7                                     | 5                                                  |
| Abruzzo       | 438                 | 2                                     | 2                                                  |
| Abruzzo       | 451                 | 4                                     | 3                                                  |
| Abruzzo       | 470                 | 1                                     | 1                                                  |
| Abruzzo       | 485                 | 2                                     | 2                                                  |
| Abruzzo       | 542                 | 3                                     | 1                                                  |
| Abruzzo       | 546                 | 1                                     | 1                                                  |
| Abruzzo       | 583                 | 3                                     | 2                                                  |
| Abruzzo       | 612                 | 1                                     | 1                                                  |
| Abruzzo       | 626                 | 3                                     | 3                                                  |
| Abruzzo       | 628                 | 1                                     | 1                                                  |
| Abruzzo       | 629                 | 1                                     | 1                                                  |
| Abruzzo       | 675                 | 1                                     | 1                                                  |
| Abruzzo       | 677                 | 5                                     | 4                                                  |
| Abruzzo       | 688                 | 1                                     | 1                                                  |

|            |      |    |   |
|------------|------|----|---|
| Abruzzo    | 711  | 1  | 1 |
| Abruzzo    | 773  | 1  | 1 |
| Abruzzo    | 796  | 2  | 1 |
| Abruzzo    | 815  | 3  | 2 |
| Abruzzo    | 816  | 2  | 1 |
| Abruzzo    | 836  | 3  | 3 |
| Abruzzo    | 838  | 1  | 1 |
| Abruzzo    | 865  | 1  | 1 |
| Abruzzo    | 873  | 3  | 2 |
| Abruzzo    | 882  | 2  | 1 |
| Abruzzo    | 913  | 2  | 1 |
| Abruzzo    | 920  | 1  | 1 |
| Abruzzo    | 954  | 1  | 1 |
| Abruzzo    | 984  | 1  | 1 |
| Abruzzo    | 1003 | 4  | 1 |
| Abruzzo    | 1006 | 1  | 1 |
| Abruzzo    | 1008 | 3  | 2 |
| Abruzzo    | 1010 | 1  | 1 |
| Abruzzo    | 1054 | 1  | 1 |
| Abruzzo    | 1113 | 3  | 2 |
| Abruzzo    | 1129 | 1  | 1 |
| Abruzzo    | 1176 | 2  | 1 |
| Abruzzo    | 1186 | 2  | 1 |
| Abruzzo    | 1219 | 1  | 1 |
| Abruzzo    | 1221 | 1  | 1 |
| Abruzzo    | 1239 | 1  | 1 |
| Abruzzo    | 1240 | 1  | 1 |
| Abruzzo    | 1242 | 1  | 1 |
| Abruzzo    | 1243 | 1  | 1 |
| Abruzzo    | 1245 | 1  | 1 |
| Basilicata | 7    | 4  | 3 |
| Basilicata | 31   | 2  | 2 |
| Basilicata | 49   | 4  | 4 |
| Basilicata | 62   | 2  | 2 |
| Basilicata | 70   | 4  | 4 |
| Basilicata | 81   | 1  | 1 |
| Basilicata | 94   | 2  | 2 |
| Basilicata | 98   | 3  | 3 |
| Basilicata | 112  | 1  | 1 |
| Basilicata | 127  | 1  | 1 |
| Basilicata | 171  | 1  | 1 |
| Basilicata | 173  | 2  | 1 |
| Basilicata | 179  | 2  | 2 |
| Basilicata | 184  | 3  | 2 |
| Basilicata | 201  | 2  | 2 |
| Basilicata | 214  | 1  | 1 |
| Basilicata | 247  | 2  | 2 |
| Basilicata | 261  | 10 | 4 |
| Basilicata | 262  | 1  | 1 |
| Basilicata | 285  | 1  | 1 |

|            |      |   |   |
|------------|------|---|---|
| Basilicata | 307  | 2 | 2 |
| Basilicata | 313  | 7 | 4 |
| Basilicata | 326  | 2 | 2 |
| Basilicata | 337  | 1 | 1 |
| Basilicata | 391  | 2 | 2 |
| Basilicata | 392  | 3 | 2 |
| Basilicata | 430  | 1 | 1 |
| Basilicata | 463  | 1 | 1 |
| Basilicata | 472  | 1 | 1 |
| Basilicata | 542  | 1 | 1 |
| Basilicata | 549  | 1 | 1 |
| Basilicata | 588  | 2 | 1 |
| Basilicata | 598  | 1 | 1 |
| Basilicata | 640  | 4 | 3 |
| Basilicata | 644  | 4 | 3 |
| Basilicata | 650  | 2 | 1 |
| Basilicata | 671  | 1 | 1 |
| Basilicata | 678  | 1 | 1 |
| Basilicata | 714  | 1 | 1 |
| Basilicata | 725  | 3 | 2 |
| Basilicata | 733  | 2 | 2 |
| Basilicata | 737  | 5 | 3 |
| Basilicata | 783  | 3 | 3 |
| Basilicata | 794  | 1 | 1 |
| Basilicata | 823  | 1 | 1 |
| Basilicata | 868  | 4 | 3 |
| Basilicata | 911  | 1 | 1 |
| Basilicata | 917  | 1 | 1 |
| Basilicata | 972  | 5 | 3 |
| Basilicata | 1057 | 1 | 1 |
| Basilicata | 1082 | 3 | 2 |
| Basilicata | 1097 | 1 | 1 |
| Basilicata | 1106 | 1 | 1 |
| Basilicata | 1189 | 1 | 1 |
| Basilicata | 1205 | 1 | 1 |
| Basilicata | 1220 | 1 | 1 |
| Basilicata | 1248 | 1 | 1 |
| Calabria   | 17   | 6 | 5 |
| Calabria   | 55   | 4 | 3 |
| Calabria   | 146  | 1 | 1 |
| Calabria   | 152  | 3 | 3 |
| Calabria   | 212  | 2 | 2 |
| Calabria   | 225  | 5 | 5 |
| Calabria   | 254  | 2 | 2 |
| Calabria   | 265  | 1 | 1 |
| Calabria   | 293  | 1 | 1 |
| Calabria   | 346  | 1 | 1 |
| Calabria   | 486  | 1 | 1 |
| Calabria   | 545  | 2 | 2 |
| Calabria   | 551  | 1 | 1 |

|          |      |   |   |
|----------|------|---|---|
| Calabria | 556  | 1 | 1 |
| Calabria | 572  | 1 | 1 |
| Calabria | 573  | 1 | 1 |
| Calabria | 577  | 5 | 4 |
| Calabria | 685  | 2 | 2 |
| Calabria | 699  | 7 | 4 |
| Calabria | 726  | 1 | 1 |
| Calabria | 727  | 4 | 3 |
| Calabria | 729  | 2 | 2 |
| Calabria | 743  | 1 | 1 |
| Calabria | 757  | 1 | 1 |
| Calabria | 760  | 1 | 1 |
| Calabria | 781  | 2 | 2 |
| Calabria | 785  | 1 | 1 |
| Calabria | 801  | 2 | 2 |
| Calabria | 834  | 2 | 2 |
| Calabria | 890  | 1 | 1 |
| Calabria | 894  | 1 | 1 |
| Calabria | 896  | 2 | 2 |
| Calabria | 898  | 1 | 1 |
| Calabria | 902  | 4 | 2 |
| Calabria | 905  | 1 | 1 |
| Calabria | 947  | 2 | 2 |
| Calabria | 1022 | 2 | 1 |
| Calabria | 1024 | 1 | 1 |
| Calabria | 1036 | 1 | 1 |
| Calabria | 1043 | 1 | 1 |
| Calabria | 1062 | 1 | 1 |
| Calabria | 1079 | 1 | 1 |
| Calabria | 1096 | 4 | 2 |
| Calabria | 1131 | 1 | 1 |
| Calabria | 1137 | 1 | 1 |
| Calabria | 1168 | 1 | 1 |
| Campania | 3    | 1 | 1 |
| Campania | 8    | 3 | 3 |
| Campania | 21   | 4 | 4 |
| Campania | 33   | 2 | 2 |
| Campania | 101  | 1 | 1 |
| Campania | 114  | 4 | 4 |
| Campania | 126  | 5 | 4 |
| Campania | 194  | 1 | 1 |
| Campania | 195  | 1 | 1 |
| Campania | 198  | 2 | 2 |
| Campania | 201  | 1 | 1 |
| Campania | 283  | 1 | 1 |
| Campania | 317  | 1 | 1 |
| Campania | 328  | 6 | 4 |
| Campania | 379  | 1 | 1 |
| Campania | 396  | 6 | 5 |
| Campania | 407  | 1 | 1 |

|                |      |   |   |
|----------------|------|---|---|
| Campania       | 417  | 1 | 1 |
| Campania       | 424  | 1 | 1 |
| Campania       | 427  | 5 | 4 |
| Campania       | 437  | 1 | 1 |
| Campania       | 442  | 1 | 1 |
| Campania       | 498  | 2 | 2 |
| Campania       | 502  | 6 | 4 |
| Campania       | 533  | 1 | 1 |
| Campania       | 535  | 1 | 1 |
| Campania       | 548  | 2 | 2 |
| Campania       | 564  | 4 | 3 |
| Campania       | 587  | 1 | 1 |
| Campania       | 600  | 1 | 1 |
| Campania       | 605  | 2 | 2 |
| Campania       | 606  | 1 | 1 |
| Campania       | 607  | 2 | 2 |
| Campania       | 613  | 1 | 1 |
| Campania       | 619  | 1 | 1 |
| Campania       | 626  | 1 | 1 |
| Campania       | 661  | 2 | 2 |
| Campania       | 666  | 4 | 3 |
| Campania       | 701  | 1 | 1 |
| Campania       | 730  | 1 | 1 |
| Campania       | 745  | 1 | 1 |
| Campania       | 747  | 2 | 2 |
| Campania       | 749  | 2 | 1 |
| Campania       | 752  | 5 | 4 |
| Campania       | 815  | 1 | 1 |
| Campania       | 816  | 2 | 1 |
| Campania       | 829  | 1 | 1 |
| Campania       | 847  | 2 | 2 |
| Campania       | 859  | 2 | 2 |
| Campania       | 864  | 2 | 2 |
| Campania       | 883  | 3 | 2 |
| Campania       | 899  | 1 | 1 |
| Campania       | 952  | 2 | 2 |
| Campania       | 960  | 1 | 1 |
| Campania       | 991  | 6 | 2 |
| Campania       | 1003 | 1 | 1 |
| Campania       | 1020 | 3 | 2 |
| Campania       | 1032 | 3 | 2 |
| Campania       | 1064 | 1 | 1 |
| Campania       | 1094 | 1 | 1 |
| Campania       | 1151 | 1 | 1 |
| Campania       | 1188 | 1 | 1 |
| Campania       | 1202 | 1 | 1 |
| Campania       | 1212 | 1 | 1 |
| Emilia-Romagna | 2    | 1 | 1 |
| Emilia-Romagna | 5    | 4 | 3 |
| Emilia-Romagna | 12   | 2 | 1 |

|                |     |    |   |
|----------------|-----|----|---|
| Emilia-Romagna | 24  | 10 | 3 |
| Emilia-Romagna | 26  | 4  | 3 |
| Emilia-Romagna | 30  | 6  | 6 |
| Emilia-Romagna | 41  | 22 | 6 |
| Emilia-Romagna | 43  | 9  | 4 |
| Emilia-Romagna | 46  | 14 | 5 |
| Emilia-Romagna | 49  | 25 | 6 |
| Emilia-Romagna | 50  | 8  | 5 |
| Emilia-Romagna | 61  | 1  | 1 |
| Emilia-Romagna | 76  | 13 | 5 |
| Emilia-Romagna | 116 | 1  | 1 |
| Emilia-Romagna | 129 | 5  | 5 |
| Emilia-Romagna | 137 | 1  | 1 |
| Emilia-Romagna | 139 | 3  | 2 |
| Emilia-Romagna | 141 | 1  | 1 |
| Emilia-Romagna | 147 | 4  | 4 |
| Emilia-Romagna | 157 | 10 | 6 |
| Emilia-Romagna | 158 | 4  | 1 |
| Emilia-Romagna | 159 | 15 | 6 |
| Emilia-Romagna | 180 | 1  | 1 |
| Emilia-Romagna | 181 | 4  | 3 |
| Emilia-Romagna | 183 | 9  | 5 |
| Emilia-Romagna | 184 | 5  | 4 |
| Emilia-Romagna | 186 | 4  | 3 |
| Emilia-Romagna | 188 | 2  | 1 |
| Emilia-Romagna | 194 | 15 | 6 |
| Emilia-Romagna | 199 | 16 | 6 |
| Emilia-Romagna | 202 | 3  | 2 |
| Emilia-Romagna | 204 | 3  | 3 |
| Emilia-Romagna | 208 | 9  | 3 |
| Emilia-Romagna | 213 | 4  | 1 |
| Emilia-Romagna | 229 | 8  | 4 |
| Emilia-Romagna | 230 | 4  | 4 |
| Emilia-Romagna | 232 | 1  | 1 |
| Emilia-Romagna | 238 | 2  | 1 |
| Emilia-Romagna | 239 | 4  | 2 |
| Emilia-Romagna | 240 | 5  | 3 |
| Emilia-Romagna | 256 | 2  | 1 |
| Emilia-Romagna | 260 | 10 | 6 |
| Emilia-Romagna | 273 | 1  | 1 |
| Emilia-Romagna | 282 | 2  | 2 |
| Emilia-Romagna | 287 | 6  | 3 |
| Emilia-Romagna | 289 | 1  | 1 |
| Emilia-Romagna | 298 | 2  | 1 |
| Emilia-Romagna | 315 | 5  | 3 |
| Emilia-Romagna | 320 | 1  | 1 |
| Emilia-Romagna | 327 | 1  | 1 |
| Emilia-Romagna | 329 | 4  | 2 |
| Emilia-Romagna | 340 | 6  | 3 |
| Emilia-Romagna | 355 | 1  | 1 |

|                |     |    |   |
|----------------|-----|----|---|
| Emilia-Romagna | 366 | 5  | 2 |
| Emilia-Romagna | 394 | 1  | 1 |
| Emilia-Romagna | 412 | 2  | 2 |
| Emilia-Romagna | 413 | 9  | 6 |
| Emilia-Romagna | 419 | 2  | 2 |
| Emilia-Romagna | 446 | 4  | 2 |
| Emilia-Romagna | 460 | 1  | 1 |
| Emilia-Romagna | 468 | 1  | 1 |
| Emilia-Romagna | 481 | 1  | 1 |
| Emilia-Romagna | 490 | 1  | 1 |
| Emilia-Romagna | 492 | 7  | 4 |
| Emilia-Romagna | 503 | 2  | 1 |
| Emilia-Romagna | 505 | 1  | 1 |
| Emilia-Romagna | 506 | 2  | 1 |
| Emilia-Romagna | 526 | 24 | 4 |
| Emilia-Romagna | 540 | 1  | 1 |
| Emilia-Romagna | 543 | 4  | 2 |
| Emilia-Romagna | 544 | 2  | 1 |
| Emilia-Romagna | 569 | 7  | 3 |
| Emilia-Romagna | 580 | 4  | 3 |
| Emilia-Romagna | 590 | 1  | 1 |
| Emilia-Romagna | 603 | 8  | 4 |
| Emilia-Romagna | 604 | 1  | 1 |
| Emilia-Romagna | 621 | 1  | 1 |
| Emilia-Romagna | 624 | 1  | 1 |
| Emilia-Romagna | 631 | 1  | 1 |
| Emilia-Romagna | 638 | 1  | 1 |
| Emilia-Romagna | 655 | 2  | 2 |
| Emilia-Romagna | 657 | 1  | 1 |
| Emilia-Romagna | 673 | 1  | 1 |
| Emilia-Romagna | 686 | 1  | 1 |
| Emilia-Romagna | 691 | 1  | 1 |
| Emilia-Romagna | 712 | 1  | 1 |
| Emilia-Romagna | 734 | 3  | 3 |
| Emilia-Romagna | 764 | 1  | 1 |
| Emilia-Romagna | 766 | 2  | 1 |
| Emilia-Romagna | 778 | 1  | 1 |
| Emilia-Romagna | 805 | 1  | 1 |
| Emilia-Romagna | 825 | 1  | 1 |
| Emilia-Romagna | 828 | 2  | 1 |
| Emilia-Romagna | 840 | 1  | 1 |
| Emilia-Romagna | 851 | 5  | 2 |
| Emilia-Romagna | 852 | 3  | 1 |
| Emilia-Romagna | 855 | 5  | 3 |
| Emilia-Romagna | 862 | 3  | 2 |
| Emilia-Romagna | 874 | 1  | 1 |
| Emilia-Romagna | 884 | 2  | 1 |
| Emilia-Romagna | 889 | 2  | 1 |
| Emilia-Romagna | 924 | 1  | 1 |
| Emilia-Romagna | 942 | 1  | 1 |

|                |      |    |   |
|----------------|------|----|---|
| Emilia-Romagna | 946  | 2  | 1 |
| Emilia-Romagna | 985  | 8  | 3 |
| Emilia-Romagna | 1001 | 4  | 1 |
| Emilia-Romagna | 1018 | 2  | 1 |
| Emilia-Romagna | 1025 | 2  | 1 |
| Emilia-Romagna | 1026 | 1  | 1 |
| Emilia-Romagna | 1031 | 3  | 2 |
| Emilia-Romagna | 1033 | 1  | 1 |
| Emilia-Romagna | 1035 | 1  | 1 |
| Emilia-Romagna | 1040 | 1  | 1 |
| Emilia-Romagna | 1045 | 1  | 1 |
| Emilia-Romagna | 1055 | 1  | 1 |
| Emilia-Romagna | 1089 | 1  | 1 |
| Emilia-Romagna | 1105 | 1  | 1 |
| Emilia-Romagna | 1114 | 2  | 1 |
| Emilia-Romagna | 1115 | 2  | 1 |
| Emilia-Romagna | 1172 | 1  | 1 |
| Emilia-Romagna | 1197 | 1  | 1 |
| Emilia-Romagna | 1204 | 1  | 1 |
| Emilia-Romagna | 1250 | 1  | 1 |
| Emilia-Romagna | 1251 | 3  | 3 |
| Emilia-Romagna | 1252 | 8  | 4 |
| Emilia-Romagna | 1253 | 3  | 2 |
| Emilia-Romagna | 1254 | 1  | 1 |
| Emilia-Romagna | 1255 | 4  | 1 |
| Emilia-Romagna | 1256 | 12 | 4 |
| Emilia-Romagna | 1257 | 1  | 1 |
| Emilia-Romagna | 1258 | 3  | 1 |
| Emilia-Romagna | 1259 | 2  | 2 |
| Emilia-Romagna | 1260 | 2  | 2 |
| Emilia-Romagna | 1261 | 2  | 1 |
| Emilia-Romagna | 1262 | 1  | 1 |
| Emilia-Romagna | 1263 | 2  | 2 |
| Emilia-Romagna | 1264 | 2  | 2 |
| Emilia-Romagna | 1265 | 2  | 1 |
| Emilia-Romagna | 1266 | 13 | 4 |
| Emilia-Romagna | 1267 | 4  | 3 |
| Emilia-Romagna | 1268 | 8  | 3 |
| Emilia-Romagna | 1269 | 6  | 4 |
| Emilia-Romagna | 1270 | 1  | 1 |
| Emilia-Romagna | 1271 | 3  | 2 |
| Emilia-Romagna | 1272 | 2  | 1 |
| Emilia-Romagna | 1273 | 1  | 1 |
| Emilia-Romagna | 1274 | 11 | 3 |
| Emilia-Romagna | 1275 | 2  | 1 |
| Emilia-Romagna | 1276 | 1  | 1 |
| Emilia-Romagna | 1277 | 1  | 1 |
| Emilia-Romagna | 1278 | 1  | 1 |
| Emilia-Romagna | 1279 | 1  | 1 |
| Emilia-Romagna | 1280 | 1  | 1 |

|                |      |    |   |
|----------------|------|----|---|
| Emilia-Romagna | 1281 | 1  | 1 |
| Emilia-Romagna | 1282 | 6  | 4 |
| Emilia-Romagna | 1283 | 2  | 2 |
| Emilia-Romagna | 1284 | 1  | 1 |
| Emilia-Romagna | 1285 | 1  | 1 |
| Emilia-Romagna | 1286 | 7  | 3 |
| Emilia-Romagna | 1287 | 2  | 1 |
| Emilia-Romagna | 1288 | 3  | 2 |
| Emilia-Romagna | 1289 | 7  | 2 |
| Emilia-Romagna | 1290 | 1  | 1 |
| Emilia-Romagna | 1291 | 3  | 2 |
| Emilia-Romagna | 1292 | 2  | 1 |
| Emilia-Romagna | 1293 | 1  | 1 |
| Emilia-Romagna | 1294 | 1  | 1 |
| Emilia-Romagna | 1295 | 1  | 1 |
| Emilia-Romagna | 1296 | 1  | 1 |
| Emilia-Romagna | 1297 | 2  | 2 |
| Emilia-Romagna | 1298 | 6  | 3 |
| Emilia-Romagna | 1299 | 4  | 3 |
| Emilia-Romagna | 1300 | 1  | 1 |
| Emilia-Romagna | 1301 | 1  | 1 |
| Emilia-Romagna | 1302 | 1  | 1 |
| Emilia-Romagna | 1303 | 7  | 4 |
| Emilia-Romagna | 1304 | 2  | 2 |
| Emilia-Romagna | 1305 | 2  | 1 |
| Emilia-Romagna | 1306 | 2  | 1 |
| Emilia-Romagna | 1307 | 2  | 2 |
| Emilia-Romagna | 1308 | 16 | 3 |
| Emilia-Romagna | 1309 | 3  | 3 |
| Emilia-Romagna | 1310 | 1  | 1 |
| Emilia-Romagna | 1311 | 1  | 1 |
| Emilia-Romagna | 1312 | 5  | 1 |
| Emilia-Romagna | 1313 | 2  | 1 |
| Emilia-Romagna | 1314 | 2  | 1 |
| Emilia-Romagna | 1315 | 1  | 1 |
| Emilia-Romagna | 1316 | 1  | 1 |
| Emilia-Romagna | 1317 | 1  | 1 |
| Emilia-Romagna | 1318 | 6  | 4 |
| Emilia-Romagna | 1319 | 3  | 1 |
| Emilia-Romagna | 1320 | 3  | 1 |
| Emilia-Romagna | 1321 | 1  | 1 |
| Emilia-Romagna | 1322 | 3  | 1 |
| Emilia-Romagna | 1323 | 4  | 3 |
| Emilia-Romagna | 1324 | 1  | 1 |
| Emilia-Romagna | 1325 | 7  | 3 |
| Emilia-Romagna | 1326 | 1  | 1 |
| Emilia-Romagna | 1327 | 1  | 1 |
| Emilia-Romagna | 1328 | 2  | 2 |
| Emilia-Romagna | 1329 | 1  | 1 |
| Emilia-Romagna | 1330 | 3  | 1 |

|                       |      |    |   |
|-----------------------|------|----|---|
| Emilia-Romagna        | 1331 | 4  | 3 |
| Emilia-Romagna        | 1332 | 1  | 1 |
| Emilia-Romagna        | 1333 | 5  | 4 |
| Emilia-Romagna        | 1334 | 2  | 1 |
| Emilia-Romagna        | 1335 | 4  | 3 |
| Emilia-Romagna        | 1336 | 3  | 2 |
| Emilia-Romagna        | 1337 | 1  | 1 |
| Emilia-Romagna        | 1338 | 2  | 2 |
| Emilia-Romagna        | 1339 | 1  | 1 |
| Emilia-Romagna        | 1340 | 2  | 1 |
| Emilia-Romagna        | 1341 | 1  | 1 |
| Emilia-Romagna        | 1342 | 1  | 1 |
| Emilia-Romagna        | 1343 | 2  | 1 |
| Emilia-Romagna        | 1344 | 3  | 1 |
| Emilia-Romagna        | 1345 | 15 | 4 |
| Emilia-Romagna        | 1346 | 3  | 3 |
| Emilia-Romagna        | 1347 | 4  | 2 |
| Emilia-Romagna        | 1348 | 1  | 1 |
| Emilia-Romagna        | 1349 | 1  | 1 |
| Emilia-Romagna        | 1350 | 4  | 2 |
| Emilia-Romagna        | 1351 | 1  | 1 |
| Emilia-Romagna        | 1352 | 2  | 1 |
| Emilia-Romagna        | 1353 | 4  | 2 |
| Emilia-Romagna        | 1354 | 2  | 2 |
| Emilia-Romagna        | 1355 | 4  | 2 |
| Emilia-Romagna        | 1356 | 3  | 1 |
| Emilia-Romagna        | 1357 | 1  | 1 |
| Emilia-Romagna        | 1358 | 10 | 3 |
| Emilia-Romagna        | 1359 | 1  | 1 |
| Emilia-Romagna        | 1360 | 3  | 1 |
| Emilia-Romagna        | 1361 | 4  | 2 |
| Emilia-Romagna        | 1362 | 8  | 3 |
| Emilia-Romagna        | 1363 | 1  | 1 |
| Emilia-Romagna        | 1364 | 1  | 1 |
| Emilia-Romagna        | 1365 | 2  | 1 |
| Emilia-Romagna        | 1366 | 1  | 1 |
| Emilia-Romagna        | 1367 | 9  | 2 |
| Emilia-Romagna        | 1368 | 4  | 2 |
| Emilia-Romagna        | 1369 | 2  | 2 |
| Emilia-Romagna        | 1370 | 3  | 1 |
| Emilia-Romagna        | 1371 | 4  | 2 |
| Emilia-Romagna        | 1372 | 1  | 1 |
| Emilia-Romagna        | 1373 | 14 | 3 |
| Emilia-Romagna        | 1374 | 2  | 1 |
| Emilia-Romagna        | 1375 | 1  | 1 |
| Emilia-Romagna        | 1376 | 1  | 1 |
| Emilia-Romagna        | 1378 | 2  | 1 |
| Emilia-Romagna        | 1379 | 1  | 1 |
| Friuli-Venezia Giulia | 86   | 14 | 5 |
| Friuli-Venezia Giulia | 135  | 1  | 1 |

|                       |      |    |   |
|-----------------------|------|----|---|
| Friuli-Venezia Giulia | 150  | 1  | 1 |
| Friuli-Venezia Giulia | 167  | 3  | 3 |
| Friuli-Venezia Giulia | 175  | 4  | 2 |
| Friuli-Venezia Giulia | 200  | 8  | 4 |
| Friuli-Venezia Giulia | 210  | 4  | 3 |
| Friuli-Venezia Giulia | 236  | 2  | 2 |
| Friuli-Venezia Giulia | 250  | 18 | 5 |
| Friuli-Venezia Giulia | 278  | 8  | 4 |
| Friuli-Venezia Giulia | 302  | 2  | 2 |
| Friuli-Venezia Giulia | 331  | 1  | 1 |
| Friuli-Venezia Giulia | 333  | 1  | 1 |
| Friuli-Venezia Giulia | 349  | 1  | 1 |
| Friuli-Venezia Giulia | 350  | 1  | 1 |
| Friuli-Venezia Giulia | 389  | 1  | 1 |
| Friuli-Venezia Giulia | 403  | 1  | 1 |
| Friuli-Venezia Giulia | 414  | 1  | 1 |
| Friuli-Venezia Giulia | 418  | 1  | 1 |
| Friuli-Venezia Giulia | 455  | 5  | 3 |
| Friuli-Venezia Giulia | 471  | 1  | 1 |
| Friuli-Venezia Giulia | 475  | 6  | 3 |
| Friuli-Venezia Giulia | 494  | 1  | 1 |
| Friuli-Venezia Giulia | 504  | 16 | 4 |
| Friuli-Venezia Giulia | 558  | 1  | 1 |
| Friuli-Venezia Giulia | 648  | 2  | 2 |
| Friuli-Venezia Giulia | 665  | 1  | 1 |
| Friuli-Venezia Giulia | 705  | 4  | 3 |
| Friuli-Venezia Giulia | 765  | 2  | 2 |
| Friuli-Venezia Giulia | 806  | 2  | 1 |
| Friuli-Venezia Giulia | 826  | 3  | 2 |
| Friuli-Venezia Giulia | 843  | 2  | 2 |
| Friuli-Venezia Giulia | 922  | 5  | 3 |
| Friuli-Venezia Giulia | 925  | 2  | 1 |
| Friuli-Venezia Giulia | 986  | 4  | 2 |
| Friuli-Venezia Giulia | 1039 | 4  | 2 |
| Friuli-Venezia Giulia | 1108 | 2  | 1 |
| Friuli-Venezia Giulia | 1146 | 1  | 1 |
| Friuli-Venezia Giulia | 1187 | 1  | 1 |
| Friuli-Venezia Giulia | 1230 | 2  | 1 |
| Friuli-Venezia Giulia | 1232 | 1  | 1 |
| Friuli-Venezia Giulia | 1235 | 1  | 1 |
| Friuli-Venezia Giulia | 1242 | 1  | 1 |
| Lazio                 | 14   | 2  | 2 |
| Lazio                 | 19   | 1  | 1 |
| Lazio                 | 58   | 2  | 2 |
| Lazio                 | 62   | 8  | 6 |
| Lazio                 | 65   | 1  | 1 |
| Lazio                 | 68   | 2  | 2 |
| Lazio                 | 74   | 1  | 1 |
| Lazio                 | 77   | 6  | 4 |
| Lazio                 | 91   | 6  | 4 |

|       |     |    |   |
|-------|-----|----|---|
| Lazio | 114 | 12 | 6 |
| Lazio | 128 | 4  | 1 |
| Lazio | 161 | 1  | 1 |
| Lazio | 171 | 6  | 6 |
| Lazio | 174 | 4  | 3 |
| Lazio | 179 | 1  | 1 |
| Lazio | 237 | 1  | 1 |
| Lazio | 246 | 2  | 2 |
| Lazio | 253 | 4  | 3 |
| Lazio | 263 | 2  | 2 |
| Lazio | 272 | 1  | 1 |
| Lazio | 286 | 3  | 2 |
| Lazio | 307 | 1  | 1 |
| Lazio | 319 | 3  | 3 |
| Lazio | 341 | 1  | 1 |
| Lazio | 342 | 1  | 1 |
| Lazio | 361 | 1  | 1 |
| Lazio | 420 | 1  | 1 |
| Lazio | 422 | 2  | 2 |
| Lazio | 436 | 1  | 1 |
| Lazio | 469 | 4  | 4 |
| Lazio | 517 | 2  | 2 |
| Lazio | 521 | 3  | 3 |
| Lazio | 525 | 1  | 1 |
| Lazio | 530 | 3  | 2 |
| Lazio | 531 | 1  | 1 |
| Lazio | 534 | 1  | 1 |
| Lazio | 561 | 4  | 4 |
| Lazio | 566 | 9  | 5 |
| Lazio | 584 | 1  | 1 |
| Lazio | 591 | 3  | 3 |
| Lazio | 626 | 2  | 2 |
| Lazio | 658 | 1  | 1 |
| Lazio | 683 | 1  | 1 |
| Lazio | 684 | 1  | 1 |
| Lazio | 689 | 1  | 1 |
| Lazio | 716 | 2  | 2 |
| Lazio | 720 | 3  | 2 |
| Lazio | 751 | 1  | 1 |
| Lazio | 754 | 3  | 2 |
| Lazio | 769 | 1  | 1 |
| Lazio | 774 | 3  | 3 |
| Lazio | 793 | 1  | 1 |
| Lazio | 808 | 1  | 1 |
| Lazio | 818 | 1  | 1 |
| Lazio | 866 | 1  | 1 |
| Lazio | 869 | 1  | 1 |
| Lazio | 895 | 1  | 1 |
| Lazio | 908 | 1  | 1 |
| Lazio | 937 | 1  | 1 |

|          |      |   |   |
|----------|------|---|---|
| Lazio    | 939  | 2 | 2 |
| Lazio    | 950  | 4 | 3 |
| Lazio    | 958  | 1 | 1 |
| Lazio    | 971  | 1 | 1 |
| Lazio    | 973  | 1 | 1 |
| Lazio    | 983  | 1 | 1 |
| Lazio    | 1053 | 1 | 1 |
| Lazio    | 1069 | 4 | 2 |
| Lazio    | 1071 | 1 | 1 |
| Lazio    | 1084 | 1 | 1 |
| Lazio    | 1103 | 1 | 1 |
| Lazio    | 1179 | 4 | 1 |
| Lazio    | 1198 | 1 | 1 |
| Lazio    | 1218 | 2 | 1 |
| Lazio    | 1249 | 2 | 1 |
| Lazio    | 1253 | 1 | 1 |
| Lazio    | 1254 | 1 | 1 |
| Lazio    | 1255 | 1 | 1 |
| Liguria  | 20   | 3 | 3 |
| Liguria  | 54   | 8 | 4 |
| Liguria  | 105  | 6 | 4 |
| Liguria  | 137  | 3 | 3 |
| Liguria  | 215  | 1 | 1 |
| Liguria  | 301  | 1 | 1 |
| Liguria  | 378  | 1 | 1 |
| Liguria  | 465  | 1 | 1 |
| Liguria  | 482  | 1 | 1 |
| Liguria  | 493  | 1 | 1 |
| Liguria  | 536  | 1 | 1 |
| Liguria  | 641  | 6 | 4 |
| Liguria  | 652  | 1 | 1 |
| Liguria  | 667  | 1 | 1 |
| Liguria  | 710  | 2 | 2 |
| Liguria  | 803  | 7 | 4 |
| Liguria  | 807  | 1 | 1 |
| Liguria  | 845  | 1 | 1 |
| Liguria  | 901  | 3 | 2 |
| Liguria  | 910  | 3 | 3 |
| Liguria  | 944  | 1 | 1 |
| Liguria  | 949  | 1 | 1 |
| Liguria  | 964  | 1 | 1 |
| Liguria  | 985  | 1 | 1 |
| Liguria  | 1028 | 2 | 1 |
| Liguria  | 1102 | 2 | 2 |
| Liguria  | 1256 | 1 | 1 |
| Liguria  | 1257 | 1 | 1 |
| Liguria  | 1377 | 1 | 1 |
| Lombardy | 2    | 8 | 5 |
| Lombardy | 4    | 1 | 1 |
| Lombardy | 6    | 6 | 6 |

|          |     |    |   |
|----------|-----|----|---|
| Lombardy | 13  | 2  | 2 |
| Lombardy | 22  | 6  | 4 |
| Lombardy | 25  | 1  | 1 |
| Lombardy | 26  | 5  | 4 |
| Lombardy | 29  | 1  | 1 |
| Lombardy | 36  | 1  | 1 |
| Lombardy | 37  | 1  | 1 |
| Lombardy | 42  | 2  | 2 |
| Lombardy | 67  | 2  | 2 |
| Lombardy | 69  | 2  | 2 |
| Lombardy | 79  | 1  | 1 |
| Lombardy | 88  | 6  | 3 |
| Lombardy | 95  | 7  | 6 |
| Lombardy | 107 | 2  | 2 |
| Lombardy | 110 | 5  | 4 |
| Lombardy | 125 | 2  | 2 |
| Lombardy | 129 | 9  | 6 |
| Lombardy | 137 | 13 | 6 |
| Lombardy | 142 | 7  | 6 |
| Lombardy | 151 | 12 | 6 |
| Lombardy | 176 | 8  | 6 |
| Lombardy | 178 | 5  | 3 |
| Lombardy | 194 | 1  | 1 |
| Lombardy | 196 | 2  | 2 |
| Lombardy | 209 | 10 | 6 |
| Lombardy | 224 | 1  | 1 |
| Lombardy | 228 | 6  | 5 |
| Lombardy | 243 | 1  | 1 |
| Lombardy | 244 | 2  | 2 |
| Lombardy | 252 | 4  | 3 |
| Lombardy | 264 | 3  | 2 |
| Lombardy | 266 | 6  | 6 |
| Lombardy | 268 | 1  | 1 |
| Lombardy | 269 | 1  | 1 |
| Lombardy | 274 | 1  | 1 |
| Lombardy | 277 | 3  | 3 |
| Lombardy | 281 | 1  | 1 |
| Lombardy | 282 | 8  | 4 |
| Lombardy | 292 | 2  | 2 |
| Lombardy | 299 | 1  | 1 |
| Lombardy | 312 | 6  | 5 |
| Lombardy | 330 | 1  | 1 |
| Lombardy | 332 | 4  | 4 |
| Lombardy | 334 | 1  | 1 |
| Lombardy | 335 | 7  | 6 |
| Lombardy | 339 | 1  | 1 |
| Lombardy | 344 | 1  | 1 |
| Lombardy | 345 | 1  | 1 |
| Lombardy | 351 | 4  | 3 |
| Lombardy | 358 | 11 | 6 |

|          |     |   |   |
|----------|-----|---|---|
| Lombardy | 359 | 1 | 1 |
| Lombardy | 363 | 2 | 2 |
| Lombardy | 366 | 1 | 1 |
| Lombardy | 367 | 3 | 2 |
| Lombardy | 368 | 1 | 1 |
| Lombardy | 371 | 1 | 1 |
| Lombardy | 390 | 4 | 4 |
| Lombardy | 404 | 1 | 1 |
| Lombardy | 408 | 2 | 2 |
| Lombardy | 411 | 1 | 1 |
| Lombardy | 423 | 1 | 1 |
| Lombardy | 425 | 1 | 1 |
| Lombardy | 429 | 1 | 1 |
| Lombardy | 432 | 1 | 1 |
| Lombardy | 433 | 5 | 3 |
| Lombardy | 439 | 1 | 1 |
| Lombardy | 454 | 3 | 2 |
| Lombardy | 467 | 1 | 1 |
| Lombardy | 482 | 8 | 6 |
| Lombardy | 484 | 1 | 1 |
| Lombardy | 499 | 4 | 4 |
| Lombardy | 507 | 2 | 2 |
| Lombardy | 522 | 1 | 1 |
| Lombardy | 568 | 1 | 1 |
| Lombardy | 592 | 5 | 5 |
| Lombardy | 595 | 2 | 2 |
| Lombardy | 614 | 2 | 1 |
| Lombardy | 617 | 1 | 1 |
| Lombardy | 633 | 1 | 1 |
| Lombardy | 636 | 1 | 1 |
| Lombardy | 637 | 1 | 1 |
| Lombardy | 642 | 4 | 3 |
| Lombardy | 649 | 4 | 3 |
| Lombardy | 672 | 2 | 2 |
| Lombardy | 690 | 2 | 2 |
| Lombardy | 692 | 2 | 2 |
| Lombardy | 700 | 1 | 1 |
| Lombardy | 703 | 1 | 1 |
| Lombardy | 718 | 2 | 2 |
| Lombardy | 762 | 1 | 1 |
| Lombardy | 763 | 1 | 1 |
| Lombardy | 764 | 2 | 2 |
| Lombardy | 768 | 1 | 1 |
| Lombardy | 805 | 4 | 3 |
| Lombardy | 811 | 2 | 2 |
| Lombardy | 821 | 5 | 4 |
| Lombardy | 840 | 4 | 3 |
| Lombardy | 841 | 1 | 1 |
| Lombardy | 852 | 6 | 4 |
| Lombardy | 857 | 7 | 4 |

|          |      |   |   |
|----------|------|---|---|
| Lombardy | 863  | 1 | 1 |
| Lombardy | 870  | 1 | 1 |
| Lombardy | 872  | 1 | 1 |
| Lombardy | 880  | 1 | 1 |
| Lombardy | 885  | 3 | 2 |
| Lombardy | 888  | 6 | 3 |
| Lombardy | 891  | 3 | 2 |
| Lombardy | 892  | 1 | 1 |
| Lombardy | 904  | 2 | 2 |
| Lombardy | 915  | 2 | 2 |
| Lombardy | 919  | 2 | 1 |
| Lombardy | 921  | 1 | 1 |
| Lombardy | 926  | 3 | 3 |
| Lombardy | 927  | 1 | 1 |
| Lombardy | 929  | 1 | 1 |
| Lombardy | 931  | 2 | 2 |
| Lombardy | 932  | 1 | 1 |
| Lombardy | 938  | 1 | 1 |
| Lombardy | 940  | 3 | 3 |
| Lombardy | 941  | 1 | 1 |
| Lombardy | 948  | 1 | 1 |
| Lombardy | 955  | 1 | 1 |
| Lombardy | 961  | 3 | 3 |
| Lombardy | 978  | 1 | 1 |
| Lombardy | 979  | 2 | 1 |
| Lombardy | 980  | 2 | 1 |
| Lombardy | 987  | 1 | 1 |
| Lombardy | 1015 | 1 | 1 |
| Lombardy | 1029 | 1 | 1 |
| Lombardy | 1044 | 2 | 2 |
| Lombardy | 1046 | 2 | 1 |
| Lombardy | 1048 | 1 | 1 |
| Lombardy | 1067 | 2 | 2 |
| Lombardy | 1068 | 1 | 1 |
| Lombardy | 1078 | 1 | 1 |
| Lombardy | 1092 | 1 | 1 |
| Lombardy | 1093 | 1 | 1 |
| Lombardy | 1107 | 1 | 1 |
| Lombardy | 1117 | 1 | 1 |
| Lombardy | 1119 | 1 | 1 |
| Lombardy | 1121 | 1 | 1 |
| Lombardy | 1125 | 2 | 2 |
| Lombardy | 1132 | 1 | 1 |
| Lombardy | 1144 | 1 | 1 |
| Lombardy | 1145 | 1 | 1 |
| Lombardy | 1154 | 1 | 1 |
| Lombardy | 1158 | 1 | 1 |
| Lombardy | 1163 | 1 | 1 |
| Lombardy | 1164 | 1 | 1 |
| Lombardy | 1178 | 1 | 1 |

|          |      |    |   |
|----------|------|----|---|
| Lombardy | 1183 | 1  | 1 |
| Lombardy | 1192 | 1  | 1 |
| Lombardy | 1204 | 1  | 1 |
| Lombardy | 1211 | 1  | 1 |
| Lombardy | 1227 | 1  | 1 |
| Lombardy | 1238 | 1  | 1 |
| Lombardy | 1241 | 1  | 1 |
| Lombardy | 1246 | 1  | 1 |
| Marche   | 45   | 1  | 1 |
| Marche   | 49   | 1  | 1 |
| Marche   | 62   | 4  | 3 |
| Marche   | 92   | 4  | 4 |
| Marche   | 136  | 2  | 2 |
| Marche   | 157  | 4  | 4 |
| Marche   | 166  | 2  | 2 |
| Marche   | 171  | 2  | 2 |
| Marche   | 179  | 2  | 2 |
| Marche   | 181  | 5  | 5 |
| Marche   | 182  | 1  | 1 |
| Marche   | 186  | 2  | 2 |
| Marche   | 194  | 10 | 4 |
| Marche   | 205  | 1  | 1 |
| Marche   | 207  | 3  | 3 |
| Marche   | 230  | 3  | 3 |
| Marche   | 288  | 2  | 2 |
| Marche   | 298  | 1  | 1 |
| Marche   | 306  | 1  | 1 |
| Marche   | 307  | 2  | 2 |
| Marche   | 308  | 6  | 4 |
| Marche   | 382  | 1  | 1 |
| Marche   | 395  | 1  | 1 |
| Marche   | 397  | 2  | 2 |
| Marche   | 416  | 3  | 3 |
| Marche   | 422  | 2  | 2 |
| Marche   | 515  | 5  | 4 |
| Marche   | 526  | 2  | 2 |
| Marche   | 565  | 1  | 1 |
| Marche   | 602  | 1  | 1 |
| Marche   | 609  | 2  | 2 |
| Marche   | 626  | 3  | 2 |
| Marche   | 635  | 1  | 1 |
| Marche   | 677  | 4  | 4 |
| Marche   | 688  | 3  | 3 |
| Marche   | 788  | 1  | 1 |
| Marche   | 796  | 4  | 2 |
| Marche   | 809  | 6  | 2 |
| Marche   | 815  | 1  | 1 |
| Marche   | 816  | 2  | 2 |
| Marche   | 827  | 3  | 2 |
| Marche   | 856  | 2  | 2 |

|          |      |    |   |
|----------|------|----|---|
| Marche   | 862  | 1  | 1 |
| Marche   | 953  | 3  | 2 |
| Marche   | 976  | 1  | 1 |
| Marche   | 1034 | 1  | 1 |
| Marche   | 1052 | 5  | 2 |
| Marche   | 1090 | 1  | 1 |
| Marche   | 1156 | 1  | 1 |
| Marche   | 1247 | 3  | 1 |
| Marche   | 1258 | 1  | 1 |
| Marche   | 1259 | 1  | 1 |
| Molise   | 49   | 6  | 5 |
| Molise   | 62   | 5  | 3 |
| Molise   | 113  | 4  | 2 |
| Molise   | 134  | 8  | 6 |
| Molise   | 146  | 5  | 4 |
| Molise   | 171  | 3  | 2 |
| Molise   | 179  | 4  | 4 |
| Molise   | 193  | 1  | 1 |
| Molise   | 248  | 5  | 4 |
| Molise   | 270  | 1  | 1 |
| Molise   | 307  | 6  | 4 |
| Molise   | 387  | 1  | 1 |
| Molise   | 514  | 4  | 3 |
| Molise   | 594  | 2  | 2 |
| Molise   | 605  | 2  | 2 |
| Molise   | 626  | 3  | 3 |
| Molise   | 721  | 3  | 3 |
| Molise   | 755  | 2  | 2 |
| Molise   | 815  | 1  | 1 |
| Molise   | 844  | 1  | 1 |
| Molise   | 850  | 1  | 1 |
| Molise   | 873  | 1  | 1 |
| Molise   | 882  | 3  | 2 |
| Molise   | 935  | 2  | 2 |
| Molise   | 951  | 3  | 3 |
| Molise   | 952  | 5  | 3 |
| Molise   | 1003 | 1  | 1 |
| Molise   | 1184 | 2  | 1 |
| Molise   | 1251 | 1  | 1 |
| Piedmont | 11   | 3  | 3 |
| Piedmont | 27   | 7  | 4 |
| Piedmont | 28   | 6  | 5 |
| Piedmont | 44   | 1  | 1 |
| Piedmont | 49   | 2  | 2 |
| Piedmont | 51   | 2  | 2 |
| Piedmont | 59   | 4  | 3 |
| Piedmont | 63   | 4  | 3 |
| Piedmont | 75   | 4  | 4 |
| Piedmont | 78   | 11 | 6 |
| Piedmont | 84   | 2  | 2 |

|          |     |    |   |
|----------|-----|----|---|
| Piedmont | 85  | 1  | 1 |
| Piedmont | 96  | 2  | 2 |
| Piedmont | 102 | 2  | 2 |
| Piedmont | 103 | 1  | 1 |
| Piedmont | 140 | 2  | 2 |
| Piedmont | 143 | 5  | 5 |
| Piedmont | 144 | 2  | 2 |
| Piedmont | 146 | 1  | 1 |
| Piedmont | 156 | 9  | 6 |
| Piedmont | 184 | 1  | 1 |
| Piedmont | 185 | 3  | 3 |
| Piedmont | 206 | 3  | 2 |
| Piedmont | 208 | 3  | 3 |
| Piedmont | 215 | 2  | 2 |
| Piedmont | 216 | 3  | 2 |
| Piedmont | 217 | 1  | 1 |
| Piedmont | 234 | 3  | 3 |
| Piedmont | 245 | 6  | 4 |
| Piedmont | 249 | 4  | 3 |
| Piedmont | 252 | 13 | 6 |
| Piedmont | 268 | 1  | 1 |
| Piedmont | 271 | 2  | 2 |
| Piedmont | 275 | 2  | 2 |
| Piedmont | 279 | 10 | 6 |
| Piedmont | 280 | 7  | 6 |
| Piedmont | 284 | 2  | 2 |
| Piedmont | 291 | 8  | 6 |
| Piedmont | 297 | 4  | 3 |
| Piedmont | 312 | 2  | 2 |
| Piedmont | 322 | 3  | 3 |
| Piedmont | 336 | 1  | 1 |
| Piedmont | 338 | 5  | 5 |
| Piedmont | 354 | 1  | 1 |
| Piedmont | 377 | 1  | 1 |
| Piedmont | 380 | 1  | 1 |
| Piedmont | 381 | 1  | 1 |
| Piedmont | 390 | 1  | 1 |
| Piedmont | 400 | 1  | 1 |
| Piedmont | 401 | 3  | 3 |
| Piedmont | 402 | 1  | 1 |
| Piedmont | 405 | 1  | 1 |
| Piedmont | 406 | 1  | 1 |
| Piedmont | 409 | 1  | 1 |
| Piedmont | 422 | 1  | 1 |
| Piedmont | 440 | 6  | 5 |
| Piedmont | 441 | 5  | 5 |
| Piedmont | 449 | 1  | 1 |
| Piedmont | 456 | 2  | 2 |
| Piedmont | 457 | 1  | 1 |
| Piedmont | 474 | 1  | 1 |

|          |     |   |   |
|----------|-----|---|---|
| Piedmont | 477 | 3 | 3 |
| Piedmont | 489 | 1 | 1 |
| Piedmont | 493 | 1 | 1 |
| Piedmont | 495 | 4 | 4 |
| Piedmont | 496 | 1 | 1 |
| Piedmont | 509 | 2 | 2 |
| Piedmont | 516 | 1 | 1 |
| Piedmont | 519 | 3 | 2 |
| Piedmont | 529 | 2 | 2 |
| Piedmont | 538 | 1 | 1 |
| Piedmont | 554 | 1 | 1 |
| Piedmont | 576 | 2 | 2 |
| Piedmont | 589 | 3 | 3 |
| Piedmont | 599 | 2 | 2 |
| Piedmont | 608 | 6 | 5 |
| Piedmont | 610 | 1 | 1 |
| Piedmont | 614 | 3 | 3 |
| Piedmont | 615 | 2 | 2 |
| Piedmont | 616 | 1 | 1 |
| Piedmont | 618 | 1 | 1 |
| Piedmont | 628 | 1 | 1 |
| Piedmont | 639 | 1 | 1 |
| Piedmont | 642 | 1 | 1 |
| Piedmont | 643 | 1 | 1 |
| Piedmont | 652 | 2 | 2 |
| Piedmont | 660 | 2 | 1 |
| Piedmont | 668 | 1 | 1 |
| Piedmont | 679 | 2 | 2 |
| Piedmont | 681 | 2 | 2 |
| Piedmont | 687 | 1 | 1 |
| Piedmont | 695 | 1 | 1 |
| Piedmont | 696 | 2 | 2 |
| Piedmont | 717 | 4 | 4 |
| Piedmont | 735 | 2 | 1 |
| Piedmont | 736 | 3 | 3 |
| Piedmont | 738 | 4 | 4 |
| Piedmont | 739 | 6 | 4 |
| Piedmont | 741 | 3 | 3 |
| Piedmont | 742 | 1 | 1 |
| Piedmont | 748 | 2 | 1 |
| Piedmont | 753 | 1 | 1 |
| Piedmont | 761 | 1 | 1 |
| Piedmont | 779 | 1 | 1 |
| Piedmont | 780 | 1 | 1 |
| Piedmont | 790 | 1 | 1 |
| Piedmont | 792 | 3 | 3 |
| Piedmont | 795 | 1 | 1 |
| Piedmont | 798 | 1 | 1 |
| Piedmont | 803 | 1 | 1 |
| Piedmont | 812 | 7 | 4 |

|          |      |    |   |
|----------|------|----|---|
| Piedmont | 817  | 10 | 4 |
| Piedmont | 830  | 4  | 2 |
| Piedmont | 831  | 1  | 1 |
| Piedmont | 835  | 1  | 1 |
| Piedmont | 842  | 1  | 1 |
| Piedmont | 861  | 2  | 2 |
| Piedmont | 875  | 1  | 1 |
| Piedmont | 886  | 3  | 2 |
| Piedmont | 903  | 1  | 1 |
| Piedmont | 907  | 4  | 2 |
| Piedmont | 936  | 1  | 1 |
| Piedmont | 956  | 1  | 1 |
| Piedmont | 962  | 3  | 2 |
| Piedmont | 965  | 2  | 2 |
| Piedmont | 966  | 1  | 1 |
| Piedmont | 967  | 6  | 3 |
| Piedmont | 974  | 3  | 2 |
| Piedmont | 977  | 2  | 2 |
| Piedmont | 980  | 1  | 1 |
| Piedmont | 993  | 1  | 1 |
| Piedmont | 998  | 1  | 1 |
| Piedmont | 1004 | 2  | 2 |
| Piedmont | 1005 | 3  | 2 |
| Piedmont | 1009 | 1  | 1 |
| Piedmont | 1023 | 1  | 1 |
| Piedmont | 1027 | 1  | 1 |
| Piedmont | 1047 | 2  | 2 |
| Piedmont | 1051 | 1  | 1 |
| Piedmont | 1058 | 1  | 1 |
| Piedmont | 1065 | 3  | 2 |
| Piedmont | 1072 | 1  | 1 |
| Piedmont | 1087 | 1  | 1 |
| Piedmont | 1095 | 3  | 2 |
| Piedmont | 1099 | 1  | 1 |
| Piedmont | 1100 | 1  | 1 |
| Piedmont | 1111 | 1  | 1 |
| Piedmont | 1112 | 1  | 1 |
| Piedmont | 1126 | 1  | 1 |
| Piedmont | 1148 | 2  | 1 |
| Piedmont | 1150 | 1  | 1 |
| Piedmont | 1152 | 1  | 1 |
| Piedmont | 1153 | 2  | 1 |
| Piedmont | 1155 | 1  | 1 |
| Piedmont | 1160 | 2  | 1 |
| Piedmont | 1169 | 1  | 1 |
| Piedmont | 1171 | 1  | 1 |
| Piedmont | 1177 | 1  | 1 |
| Piedmont | 1180 | 1  | 1 |
| Piedmont | 1182 | 1  | 1 |
| Piedmont | 1196 | 1  | 1 |

|          |      |   |   |
|----------|------|---|---|
| Piedmont | 1200 | 1 | 1 |
| Piedmont | 1203 | 1 | 1 |
| Piedmont | 1217 | 1 | 1 |
| Piedmont | 1222 | 1 | 1 |
| Piedmont | 1223 | 1 | 1 |
| Piedmont | 1224 | 1 | 1 |
| Piedmont | 1240 | 1 | 1 |
| Puglia   | 7    | 6 | 3 |
| Puglia   | 8    | 2 | 2 |
| Puglia   | 31   | 5 | 2 |
| Puglia   | 62   | 3 | 2 |
| Puglia   | 71   | 2 | 2 |
| Puglia   | 72   | 9 | 4 |
| Puglia   | 97   | 3 | 3 |
| Puglia   | 98   | 3 | 3 |
| Puglia   | 112  | 6 | 5 |
| Puglia   | 117  | 1 | 1 |
| Puglia   | 146  | 3 | 3 |
| Puglia   | 160  | 1 | 1 |
| Puglia   | 171  | 4 | 3 |
| Puglia   | 173  | 6 | 5 |
| Puglia   | 179  | 2 | 2 |
| Puglia   | 197  | 1 | 1 |
| Puglia   | 201  | 3 | 3 |
| Puglia   | 207  | 3 | 3 |
| Puglia   | 214  | 3 | 2 |
| Puglia   | 230  | 2 | 2 |
| Puglia   | 251  | 1 | 1 |
| Puglia   | 255  | 2 | 2 |
| Puglia   | 270  | 1 | 1 |
| Puglia   | 305  | 2 | 2 |
| Puglia   | 307  | 2 | 2 |
| Puglia   | 314  | 3 | 3 |
| Puglia   | 337  | 1 | 1 |
| Puglia   | 383  | 6 | 5 |
| Puglia   | 421  | 7 | 6 |
| Puglia   | 424  | 1 | 1 |
| Puglia   | 476  | 4 | 3 |
| Puglia   | 485  | 2 | 2 |
| Puglia   | 487  | 2 | 2 |
| Puglia   | 539  | 1 | 1 |
| Puglia   | 548  | 2 | 2 |
| Puglia   | 552  | 1 | 1 |
| Puglia   | 555  | 1 | 1 |
| Puglia   | 559  | 1 | 1 |
| Puglia   | 560  | 1 | 1 |
| Puglia   | 562  | 1 | 1 |
| Puglia   | 570  | 1 | 1 |
| Puglia   | 578  | 5 | 4 |
| Puglia   | 582  | 6 | 5 |

|          |      |    |   |
|----------|------|----|---|
| Puglia   | 585  | 5  | 3 |
| Puglia   | 588  | 4  | 4 |
| Puglia   | 626  | 3  | 1 |
| Puglia   | 630  | 2  | 2 |
| Puglia   | 645  | 2  | 2 |
| Puglia   | 646  | 3  | 2 |
| Puglia   | 650  | 1  | 1 |
| Puglia   | 653  | 5  | 4 |
| Puglia   | 678  | 2  | 2 |
| Puglia   | 693  | 1  | 1 |
| Puglia   | 698  | 3  | 3 |
| Puglia   | 706  | 5  | 4 |
| Puglia   | 707  | 3  | 2 |
| Puglia   | 722  | 2  | 1 |
| Puglia   | 749  | 2  | 1 |
| Puglia   | 782  | 4  | 3 |
| Puglia   | 789  | 3  | 3 |
| Puglia   | 794  | 2  | 1 |
| Puglia   | 815  | 9  | 1 |
| Puglia   | 816  | 11 | 3 |
| Puglia   | 829  | 1  | 1 |
| Puglia   | 850  | 3  | 2 |
| Puglia   | 854  | 2  | 2 |
| Puglia   | 860  | 1  | 1 |
| Puglia   | 883  | 3  | 3 |
| Puglia   | 911  | 2  | 2 |
| Puglia   | 912  | 1  | 1 |
| Puglia   | 923  | 1  | 1 |
| Puglia   | 933  | 1  | 1 |
| Puglia   | 994  | 1  | 1 |
| Puglia   | 1013 | 1  | 1 |
| Puglia   | 1016 | 2  | 1 |
| Puglia   | 1139 | 2  | 1 |
| Puglia   | 1157 | 1  | 1 |
| Puglia   | 1161 | 2  | 1 |
| Puglia   | 1170 | 1  | 1 |
| Puglia   | 1219 | 2  | 1 |
| Puglia   | 1244 | 1  | 1 |
| Puglia   | 1260 | 1  | 1 |
| Puglia   | 1261 | 1  | 1 |
| Puglia   | 1262 | 1  | 1 |
| Sardinia | 1    | 2  | 2 |
| Sardinia | 10   | 7  | 5 |
| Sardinia | 15   | 1  | 1 |
| Sardinia | 38   | 6  | 3 |
| Sardinia | 39   | 1  | 1 |
| Sardinia | 89   | 13 | 6 |
| Sardinia | 93   | 10 | 6 |
| Sardinia | 99   | 2  | 2 |
| Sardinia | 104  | 5  | 4 |

|          |      |    |   |
|----------|------|----|---|
| Sardinia | 130  | 4  | 3 |
| Sardinia | 131  | 8  | 5 |
| Sardinia | 133  | 4  | 4 |
| Sardinia | 148  | 6  | 3 |
| Sardinia | 154  | 9  | 5 |
| Sardinia | 155  | 2  | 2 |
| Sardinia | 162  | 7  | 3 |
| Sardinia | 189  | 2  | 1 |
| Sardinia | 231  | 1  | 1 |
| Sardinia | 242  | 1  | 1 |
| Sardinia | 257  | 6  | 4 |
| Sardinia | 300  | 3  | 3 |
| Sardinia | 316  | 11 | 5 |
| Sardinia | 393  | 8  | 1 |
| Sardinia | 444  | 6  | 4 |
| Sardinia | 461  | 2  | 2 |
| Sardinia | 462  | 1  | 1 |
| Sardinia | 488  | 2  | 2 |
| Sardinia | 527  | 1  | 1 |
| Sardinia | 541  | 1  | 1 |
| Sardinia | 547  | 1  | 1 |
| Sardinia | 611  | 3  | 2 |
| Sardinia | 647  | 7  | 5 |
| Sardinia | 669  | 1  | 1 |
| Sardinia | 708  | 1  | 1 |
| Sardinia | 724  | 2  | 2 |
| Sardinia | 746  | 6  | 4 |
| Sardinia | 767  | 3  | 3 |
| Sardinia | 775  | 1  | 1 |
| Sardinia | 776  | 3  | 2 |
| Sardinia | 786  | 3  | 2 |
| Sardinia | 791  | 5  | 2 |
| Sardinia | 833  | 1  | 1 |
| Sardinia | 839  | 2  | 1 |
| Sardinia | 877  | 1  | 1 |
| Sardinia | 878  | 4  | 2 |
| Sardinia | 881  | 6  | 3 |
| Sardinia | 893  | 9  | 2 |
| Sardinia | 897  | 1  | 1 |
| Sardinia | 900  | 4  | 3 |
| Sardinia | 906  | 2  | 1 |
| Sardinia | 909  | 1  | 1 |
| Sardinia | 943  | 4  | 2 |
| Sardinia | 963  | 2  | 2 |
| Sardinia | 996  | 2  | 2 |
| Sardinia | 1007 | 1  | 1 |
| Sardinia | 1050 | 2  | 1 |
| Sardinia | 1061 | 2  | 1 |
| Sardinia | 1066 | 3  | 1 |
| Sardinia | 1116 | 2  | 2 |

|          |      |    |   |
|----------|------|----|---|
| Sardinia | 1118 | 1  | 1 |
| Sardinia | 1138 | 2  | 1 |
| Sardinia | 1159 | 1  | 1 |
| Sardinia | 1162 | 1  | 1 |
| Sardinia | 1167 | 1  | 1 |
| Sardinia | 1174 | 1  | 1 |
| Sardinia | 1175 | 1  | 1 |
| Sardinia | 1233 | 1  | 1 |
| Sardinia | 1249 | 1  | 1 |
| Sardinia | 1250 | 1  | 1 |
| Sicily   | 9    | 5  | 4 |
| Sicily   | 16   | 1  | 1 |
| Sicily   | 34   | 3  | 3 |
| Sicily   | 64   | 6  | 5 |
| Sicily   | 109  | 7  | 5 |
| Sicily   | 111  | 1  | 1 |
| Sicily   | 119  | 10 | 6 |
| Sicily   | 132  | 3  | 3 |
| Sicily   | 145  | 1  | 1 |
| Sicily   | 163  | 3  | 2 |
| Sicily   | 164  | 1  | 1 |
| Sicily   | 177  | 4  | 2 |
| Sicily   | 211  | 2  | 2 |
| Sicily   | 222  | 1  | 1 |
| Sicily   | 259  | 3  | 2 |
| Sicily   | 290  | 5  | 4 |
| Sicily   | 296  | 8  | 4 |
| Sicily   | 318  | 7  | 5 |
| Sicily   | 323  | 1  | 1 |
| Sicily   | 353  | 1  | 1 |
| Sicily   | 356  | 1  | 1 |
| Sicily   | 375  | 1  | 1 |
| Sicily   | 376  | 1  | 1 |
| Sicily   | 398  | 1  | 1 |
| Sicily   | 435  | 5  | 5 |
| Sicily   | 458  | 2  | 2 |
| Sicily   | 459  | 3  | 3 |
| Sicily   | 473  | 2  | 2 |
| Sicily   | 497  | 2  | 2 |
| Sicily   | 500  | 2  | 2 |
| Sicily   | 510  | 9  | 5 |
| Sicily   | 532  | 1  | 1 |
| Sicily   | 553  | 1  | 1 |
| Sicily   | 557  | 6  | 5 |
| Sicily   | 571  | 1  | 1 |
| Sicily   | 574  | 2  | 2 |
| Sicily   | 593  | 1  | 1 |
| Sicily   | 597  | 2  | 1 |
| Sicily   | 627  | 1  | 1 |
| Sicily   | 632  | 1  | 1 |

|         |      |   |   |
|---------|------|---|---|
| Sicily  | 656  | 1 | 1 |
| Sicily  | 663  | 3 | 3 |
| Sicily  | 664  | 1 | 1 |
| Sicily  | 676  | 1 | 1 |
| Sicily  | 694  | 2 | 2 |
| Sicily  | 697  | 1 | 1 |
| Sicily  | 702  | 1 | 1 |
| Sicily  | 704  | 1 | 1 |
| Sicily  | 709  | 1 | 1 |
| Sicily  | 728  | 1 | 1 |
| Sicily  | 732  | 4 | 4 |
| Sicily  | 750  | 5 | 4 |
| Sicily  | 759  | 5 | 4 |
| Sicily  | 819  | 2 | 2 |
| Sicily  | 837  | 3 | 2 |
| Sicily  | 846  | 3 | 2 |
| Sicily  | 867  | 1 | 1 |
| Sicily  | 871  | 1 | 1 |
| Sicily  | 876  | 2 | 2 |
| Sicily  | 957  | 3 | 3 |
| Sicily  | 988  | 1 | 1 |
| Sicily  | 989  | 1 | 1 |
| Sicily  | 992  | 1 | 1 |
| Sicily  | 997  | 1 | 1 |
| Sicily  | 1019 | 2 | 1 |
| Sicily  | 1077 | 1 | 1 |
| Sicily  | 1086 | 1 | 1 |
| Sicily  | 1091 | 1 | 1 |
| Sicily  | 1101 | 2 | 2 |
| Sicily  | 1109 | 1 | 1 |
| Sicily  | 1124 | 1 | 1 |
| Sicily  | 1136 | 1 | 1 |
| Sicily  | 1141 | 1 | 1 |
| Sicily  | 1142 | 1 | 1 |
| Sicily  | 1147 | 2 | 1 |
| Sicily  | 1149 | 1 | 1 |
| Sicily  | 1165 | 1 | 1 |
| Sicily  | 1199 | 1 | 1 |
| Sicily  | 1226 | 1 | 1 |
| Sicily  | 1229 | 2 | 1 |
| Sicily  | 1231 | 1 | 1 |
| Sicily  | 1246 | 1 | 1 |
| Sicily  | 1247 | 1 | 1 |
| Sicily  | 1248 | 1 | 1 |
| Tuscany | 12   | 1 | 1 |
| Tuscany | 23   | 3 | 3 |
| Tuscany | 49   | 2 | 2 |
| Tuscany | 53   | 2 | 2 |
| Tuscany | 73   | 3 | 3 |
| Tuscany | 80   | 1 | 1 |

|         |     |    |   |
|---------|-----|----|---|
| Tuscany | 82  | 1  | 1 |
| Tuscany | 83  | 2  | 2 |
| Tuscany | 116 | 8  | 6 |
| Tuscany | 122 | 4  | 3 |
| Tuscany | 137 | 3  | 3 |
| Tuscany | 147 | 4  | 4 |
| Tuscany | 157 | 6  | 6 |
| Tuscany | 158 | 1  | 1 |
| Tuscany | 168 | 4  | 3 |
| Tuscany | 170 | 10 | 6 |
| Tuscany | 172 | 12 | 6 |
| Tuscany | 181 | 2  | 2 |
| Tuscany | 187 | 3  | 3 |
| Tuscany | 230 | 1  | 1 |
| Tuscany | 237 | 1  | 1 |
| Tuscany | 238 | 1  | 1 |
| Tuscany | 239 | 1  | 1 |
| Tuscany | 258 | 1  | 1 |
| Tuscany | 267 | 1  | 1 |
| Tuscany | 347 | 1  | 1 |
| Tuscany | 352 | 1  | 1 |
| Tuscany | 360 | 1  | 1 |
| Tuscany | 385 | 1  | 1 |
| Tuscany | 386 | 1  | 1 |
| Tuscany | 388 | 1  | 1 |
| Tuscany | 399 | 3  | 3 |
| Tuscany | 443 | 2  | 2 |
| Tuscany | 478 | 1  | 1 |
| Tuscany | 480 | 3  | 3 |
| Tuscany | 483 | 2  | 2 |
| Tuscany | 492 | 3  | 3 |
| Tuscany | 501 | 1  | 1 |
| Tuscany | 506 | 1  | 1 |
| Tuscany | 512 | 1  | 1 |
| Tuscany | 521 | 8  | 4 |
| Tuscany | 524 | 1  | 1 |
| Tuscany | 537 | 2  | 2 |
| Tuscany | 579 | 3  | 3 |
| Tuscany | 620 | 1  | 1 |
| Tuscany | 622 | 1  | 1 |
| Tuscany | 623 | 3  | 3 |
| Tuscany | 634 | 1  | 1 |
| Tuscany | 649 | 1  | 1 |
| Tuscany | 654 | 1  | 1 |
| Tuscany | 659 | 4  | 4 |
| Tuscany | 680 | 1  | 1 |
| Tuscany | 756 | 2  | 2 |
| Tuscany | 771 | 1  | 1 |
| Tuscany | 772 | 1  | 1 |
| Tuscany | 787 | 1  | 1 |

|                     |      |    |   |
|---------------------|------|----|---|
| Tuscany             | 804  | 1  | 1 |
| Tuscany             | 813  | 1  | 1 |
| Tuscany             | 820  | 3  | 3 |
| Tuscany             | 824  | 1  | 1 |
| Tuscany             | 853  | 1  | 1 |
| Tuscany             | 855  | 1  | 1 |
| Tuscany             | 887  | 2  | 2 |
| Tuscany             | 914  | 1  | 1 |
| Tuscany             | 916  | 4  | 3 |
| Tuscany             | 928  | 1  | 1 |
| Tuscany             | 930  | 2  | 2 |
| Tuscany             | 945  | 2  | 1 |
| Tuscany             | 959  | 2  | 2 |
| Tuscany             | 964  | 1  | 1 |
| Tuscany             | 969  | 1  | 1 |
| Tuscany             | 970  | 1  | 1 |
| Tuscany             | 995  | 2  | 2 |
| Tuscany             | 1000 | 3  | 2 |
| Tuscany             | 1002 | 2  | 1 |
| Tuscany             | 1017 | 1  | 1 |
| Tuscany             | 1037 | 2  | 1 |
| Tuscany             | 1044 | 1  | 1 |
| Tuscany             | 1049 | 1  | 1 |
| Tuscany             | 1059 | 1  | 1 |
| Tuscany             | 1060 | 1  | 1 |
| Tuscany             | 1080 | 4  | 2 |
| Tuscany             | 1085 | 2  | 2 |
| Tuscany             | 1098 | 1  | 1 |
| Tuscany             | 1122 | 1  | 1 |
| Tuscany             | 1127 | 1  | 1 |
| Tuscany             | 1134 | 2  | 2 |
| Tuscany             | 1213 | 2  | 1 |
| Tuscany             | 1225 | 1  | 1 |
| Trentino-Alto Adige | 2    | 1  | 1 |
| Trentino-Alto Adige | 32   | 1  | 1 |
| Trentino-Alto Adige | 40   | 3  | 3 |
| Trentino-Alto Adige | 100  | 1  | 1 |
| Trentino-Alto Adige | 106  | 1  | 1 |
| Trentino-Alto Adige | 121  | 1  | 1 |
| Trentino-Alto Adige | 124  | 4  | 4 |
| Trentino-Alto Adige | 149  | 6  | 6 |
| Trentino-Alto Adige | 153  | 3  | 3 |
| Trentino-Alto Adige | 165  | 5  | 3 |
| Trentino-Alto Adige | 190  | 2  | 2 |
| Trentino-Alto Adige | 191  | 3  | 2 |
| Trentino-Alto Adige | 192  | 5  | 3 |
| Trentino-Alto Adige | 221  | 10 | 6 |
| Trentino-Alto Adige | 258  | 3  | 2 |
| Trentino-Alto Adige | 282  | 1  | 1 |
| Trentino-Alto Adige | 295  | 3  | 3 |

|                     |      |   |   |
|---------------------|------|---|---|
| Trentino-Alto Adige | 343  | 2 | 2 |
| Trentino-Alto Adige | 359  | 1 | 1 |
| Trentino-Alto Adige | 365  | 4 | 3 |
| Trentino-Alto Adige | 370  | 1 | 1 |
| Trentino-Alto Adige | 373  | 3 | 2 |
| Trentino-Alto Adige | 439  | 9 | 4 |
| Trentino-Alto Adige | 450  | 1 | 1 |
| Trentino-Alto Adige | 466  | 2 | 1 |
| Trentino-Alto Adige | 491  | 1 | 1 |
| Trentino-Alto Adige | 503  | 1 | 1 |
| Trentino-Alto Adige | 531  | 1 | 1 |
| Trentino-Alto Adige | 567  | 7 | 5 |
| Trentino-Alto Adige | 586  | 1 | 1 |
| Trentino-Alto Adige | 601  | 3 | 1 |
| Trentino-Alto Adige | 674  | 1 | 1 |
| Trentino-Alto Adige | 713  | 2 | 1 |
| Trentino-Alto Adige | 719  | 5 | 4 |
| Trentino-Alto Adige | 770  | 7 | 4 |
| Trentino-Alto Adige | 800  | 1 | 1 |
| Trentino-Alto Adige | 802  | 2 | 2 |
| Trentino-Alto Adige | 879  | 1 | 1 |
| Trentino-Alto Adige | 931  | 2 | 2 |
| Trentino-Alto Adige | 982  | 3 | 2 |
| Trentino-Alto Adige | 999  | 1 | 1 |
| Trentino-Alto Adige | 1001 | 1 | 1 |
| Trentino-Alto Adige | 1011 | 3 | 2 |
| Trentino-Alto Adige | 1030 | 1 | 1 |
| Trentino-Alto Adige | 1063 | 2 | 2 |
| Trentino-Alto Adige | 1083 | 1 | 1 |
| Trentino-Alto Adige | 1088 | 2 | 1 |
| Trentino-Alto Adige | 1110 | 1 | 1 |
| Trentino-Alto Adige | 1130 | 3 | 2 |
| Trentino-Alto Adige | 1133 | 1 | 1 |
| Trentino-Alto Adige | 1135 | 1 | 1 |
| Trentino-Alto Adige | 1140 | 1 | 1 |
| Trentino-Alto Adige | 1173 | 1 | 1 |
| Trentino-Alto Adige | 1185 | 1 | 1 |
| Trentino-Alto Adige | 1201 | 1 | 1 |
| Trentino-Alto Adige | 1210 | 1 | 1 |
| Trentino-Alto Adige | 1214 | 1 | 1 |
| Trentino-Alto Adige | 1234 | 1 | 1 |
| Trentino-Alto Adige | 1236 | 2 | 1 |
| Trentino-Alto Adige | 1241 | 2 | 1 |
| Trentino-Alto Adige | 1243 | 2 | 1 |
| Trentino-Alto Adige | 1244 | 1 | 1 |
| Umbria              | 49   | 1 | 1 |
| Umbria              | 120  | 3 | 3 |
| Umbria              | 169  | 1 | 1 |
| Umbria              | 187  | 9 | 5 |
| Umbria              | 207  | 1 | 1 |

|               |      |    |   |
|---------------|------|----|---|
| Umbria        | 237  | 4  | 4 |
| Umbria        | 272  | 1  | 1 |
| Umbria        | 325  | 1  | 1 |
| Umbria        | 399  | 5  | 5 |
| Umbria        | 422  | 6  | 4 |
| Umbria        | 426  | 1  | 1 |
| Umbria        | 445  | 1  | 1 |
| Umbria        | 447  | 1  | 1 |
| Umbria        | 448  | 1  | 1 |
| Umbria        | 464  | 3  | 3 |
| Umbria        | 523  | 1  | 1 |
| Umbria        | 531  | 6  | 4 |
| Umbria        | 563  | 1  | 1 |
| Umbria        | 575  | 1  | 1 |
| Umbria        | 596  | 2  | 2 |
| Umbria        | 662  | 1  | 1 |
| Umbria        | 682  | 1  | 1 |
| Umbria        | 784  | 1  | 1 |
| Umbria        | 797  | 1  | 1 |
| Umbria        | 849  | 1  | 1 |
| Umbria        | 887  | 2  | 2 |
| Umbria        | 916  | 3  | 2 |
| Umbria        | 968  | 1  | 1 |
| Umbria        | 1191 | 1  | 1 |
| Umbria        | 1209 | 1  | 1 |
| Umbria        | 1215 | 2  | 1 |
| Umbria        | 1228 | 1  | 1 |
| Valle d'Aosta | 44   | 6  | 2 |
| Valle d'Aosta | 48   | 1  | 1 |
| Valle d'Aosta | 156  | 24 | 6 |
| Valle d'Aosta | 226  | 4  | 3 |
| Valle d'Aosta | 324  | 8  | 5 |
| Valle d'Aosta | 452  | 1  | 1 |
| Valle d'Aosta | 457  | 4  | 3 |
| Valle d'Aosta | 508  | 1  | 1 |
| Valle d'Aosta | 581  | 1  | 1 |
| Valle d'Aosta | 612  | 1  | 1 |
| Valle d'Aosta | 615  | 2  | 2 |
| Valle d'Aosta | 679  | 12 | 4 |
| Valle d'Aosta | 742  | 11 | 4 |
| Valle d'Aosta | 810  | 1  | 1 |
| Valle d'Aosta | 822  | 2  | 1 |
| Valle d'Aosta | 835  | 1  | 1 |
| Valle d'Aosta | 981  | 4  | 1 |
| Valle d'Aosta | 1075 | 1  | 1 |
| Valle d'Aosta | 1123 | 1  | 1 |
| Valle d'Aosta | 1193 | 1  | 1 |
| Valle d'Aosta | 1208 | 1  | 1 |
| Valle d'Aosta | 1238 | 1  | 1 |
| Valle d'Aosta | 1239 | 1  | 1 |

|        |     |    |   |
|--------|-----|----|---|
| Veneto | 18  | 1  | 1 |
| Veneto | 47  | 2  | 2 |
| Veneto | 52  | 13 | 5 |
| Veneto | 56  | 1  | 1 |
| Veneto | 57  | 2  | 2 |
| Veneto | 60  | 1  | 1 |
| Veneto | 61  | 1  | 1 |
| Veneto | 100 | 9  | 5 |
| Veneto | 115 | 3  | 2 |
| Veneto | 118 | 1  | 1 |
| Veneto | 123 | 4  | 3 |
| Veneto | 138 | 4  | 3 |
| Veneto | 167 | 8  | 5 |
| Veneto | 220 | 4  | 4 |
| Veneto | 224 | 1  | 1 |
| Veneto | 227 | 5  | 5 |
| Veneto | 233 | 6  | 4 |
| Veneto | 235 | 2  | 2 |
| Veneto | 240 | 1  | 1 |
| Veneto | 250 | 1  | 1 |
| Veneto | 276 | 12 | 6 |
| Veneto | 282 | 1  | 1 |
| Veneto | 292 | 1  | 1 |
| Veneto | 303 | 2  | 2 |
| Veneto | 309 | 1  | 1 |
| Veneto | 310 | 1  | 1 |
| Veneto | 311 | 1  | 1 |
| Veneto | 362 | 1  | 1 |
| Veneto | 364 | 1  | 1 |
| Veneto | 365 | 2  | 2 |
| Veneto | 369 | 2  | 2 |
| Veneto | 372 | 3  | 3 |
| Veneto | 374 | 2  | 2 |
| Veneto | 384 | 4  | 2 |
| Veneto | 408 | 3  | 3 |
| Veneto | 414 | 1  | 1 |
| Veneto | 415 | 2  | 2 |
| Veneto | 428 | 3  | 3 |
| Veneto | 431 | 2  | 2 |
| Veneto | 453 | 1  | 1 |
| Veneto | 479 | 1  | 1 |
| Veneto | 511 | 1  | 1 |
| Veneto | 513 | 3  | 2 |
| Veneto | 518 | 1  | 1 |
| Veneto | 520 | 9  | 3 |
| Veneto | 528 | 1  | 1 |
| Veneto | 550 | 8  | 4 |
| Veneto | 625 | 10 | 4 |
| Veneto | 648 | 4  | 2 |
| Veneto | 651 | 3  | 1 |

|        |      |    |   |
|--------|------|----|---|
| Veneto | 670  | 1  | 1 |
| Veneto | 713  | 2  | 2 |
| Veneto | 715  | 1  | 1 |
| Veneto | 723  | 4  | 2 |
| Veneto | 731  | 3  | 1 |
| Veneto | 740  | 5  | 3 |
| Veneto | 744  | 18 | 4 |
| Veneto | 758  | 7  | 2 |
| Veneto | 764  | 1  | 1 |
| Veneto | 777  | 10 | 3 |
| Veneto | 799  | 4  | 2 |
| Veneto | 814  | 7  | 3 |
| Veneto | 832  | 3  | 1 |
| Veneto | 848  | 2  | 1 |
| Veneto | 858  | 4  | 2 |
| Veneto | 918  | 1  | 1 |
| Veneto | 931  | 3  | 3 |
| Veneto | 934  | 1  | 1 |
| Veneto | 942  | 1  | 1 |
| Veneto | 975  | 1  | 1 |
| Veneto | 990  | 2  | 2 |
| Veneto | 1012 | 1  | 1 |
| Veneto | 1014 | 1  | 1 |
| Veneto | 1021 | 2  | 2 |
| Veneto | 1038 | 1  | 1 |
| Veneto | 1041 | 1  | 1 |
| Veneto | 1042 | 1  | 1 |
| Veneto | 1056 | 1  | 1 |
| Veneto | 1070 | 1  | 1 |
| Veneto | 1073 | 1  | 1 |
| Veneto | 1074 | 1  | 1 |
| Veneto | 1076 | 1  | 1 |
| Veneto | 1081 | 1  | 1 |
| Veneto | 1104 | 1  | 1 |
| Veneto | 1120 | 1  | 1 |
| Veneto | 1128 | 2  | 2 |
| Veneto | 1130 | 1  | 1 |
| Veneto | 1143 | 1  | 1 |
| Veneto | 1166 | 1  | 1 |
| Veneto | 1181 | 1  | 1 |
| Veneto | 1190 | 1  | 1 |
| Veneto | 1194 | 1  | 1 |
| Veneto | 1195 | 1  | 1 |
| Veneto | 1201 | 1  | 1 |
| Veneto | 1206 | 1  | 1 |
| Veneto | 1207 | 1  | 1 |
| Veneto | 1216 | 2  | 1 |
| Veneto | 1237 | 3  | 1 |

---

**Supplementary Table S7.** Honey samples produced from 1986 to 2017.

| <b>Sample ID</b> | <b>Year</b> | <b>Region</b>  |
|------------------|-------------|----------------|
| 1                | 1986        | Emilia-Romagna |
| 28               | 1987        | Emilia-Romagna |
| 34               | 1987        | Emilia-Romagna |
| 37               | 1988        | Emilia-Romagna |
| 44               | 1988        | Emilia-Romagna |
| 62               | 1988        | Emilia-Romagna |
| 30               | 1989        | Emilia-Romagna |
| 32               | 1989        | Emilia-Romagna |
| 33               | 1989        | Emilia-Romagna |
| 63               | 1989        | Emilia-Romagna |
| 29               | 1990        | Emilia-Romagna |
| 64               | 1990        | Emilia-Romagna |
| 27               | 1991        | Emilia-Romagna |
| 35               | 1991        | Emilia-Romagna |
| 55               | 1991        | Emilia-Romagna |
| 18               | 1992        | Emilia-Romagna |
| 66               | 1992        | Emilia-Romagna |
| 7                | 1993        | Emilia-Romagna |
| 43               | 1993        | Emilia-Romagna |
| 52               | 1993        | Emilia-Romagna |
| 53               | 1993        | Emilia-Romagna |
| 58               | 1993        | Emilia-Romagna |
| 11               | 1994        | Emilia-Romagna |
| 13               | 1994        | Emilia-Romagna |
| 20               | 1994        | Emilia-Romagna |
| 40               | 1994        | Emilia-Romagna |
| 8                | 1995        | Emilia-Romagna |
| 12               | 1995        | Emilia-Romagna |
| 14               | 1995        | Emilia-Romagna |
| 17               | 1995        | Emilia-Romagna |
| 36               | 1995        | Emilia-Romagna |
| 49               | 1995        | Emilia-Romagna |
| 6                | 1996        | Emilia-Romagna |
| 16               | 1996        | Emilia-Romagna |
| 50               | 1996        | Emilia-Romagna |
| 51               | 1996        | Emilia-Romagna |
| 42               | 1997        | Emilia-Romagna |
| 45               | 1997        | Emilia-Romagna |
| 48               | 1997        | Emilia-Romagna |
| 54               | 1997        | Emilia-Romagna |
| 47               | 1998        | Emilia-Romagna |
| 19               | 2000        | Emilia-Romagna |
| 23               | 2000        | Emilia-Romagna |

|     |      |                       |
|-----|------|-----------------------|
| 31  | 2000 | Emilia-Romagna        |
| 39  | 2000 | Emilia-Romagna        |
| 57  | 2000 | Emilia-Romagna        |
| 65  | 2000 | Emilia-Romagna        |
| 24  | 2001 | Emilia-Romagna        |
| 38  | 2001 | Emilia-Romagna        |
| 41  | 2001 | Emilia-Romagna        |
| 61  | 2001 | Emilia-Romagna        |
| 10  | 2002 | Emilia-Romagna        |
| 21  | 2002 | Emilia-Romagna        |
| 26  | 2002 | Emilia-Romagna        |
| 4   | 2003 | Emilia-Romagna        |
| 60  | 2003 | Emilia-Romagna        |
| 2   | 2004 | Emilia-Romagna        |
| 3   | 2004 | Emilia-Romagna        |
| 5   | 2004 | Emilia-Romagna        |
| 9   | 2004 | Emilia-Romagna        |
| 25  | 2004 | Emilia-Romagna        |
| 3   | 2005 | Lombardia             |
| 8   | 2005 | Lombardia             |
| 15  | 2005 | Emilia-Romagna        |
| 46  | 2005 | Emilia-Romagna        |
| 59  | 2005 | Emilia-Romagna        |
| 1   | 2006 | Piedmont              |
| 2   | 2006 | Puglia                |
| 5   | 2006 | Trentino-Alto Adige   |
| 6   | 2006 | Lombardy              |
| 10  | 2006 | Campania              |
| 16  | 2008 | Umbria                |
| 146 | 2012 | Piedmont              |
| 56  | 2012 | Emilia-Romagna        |
| 41  | 2013 | Emilia-Romagna        |
| 144 | 2013 | Sicily                |
| 34  | 2014 | Sicily                |
| 49  | 2014 | Emilia-Romagna        |
| 50  | 2014 | Sardinia              |
| 149 | 2014 | Emilia-Romagna        |
| 157 | 2014 | Sardinia              |
| 1   | 2015 | Trentino-Alto Adige   |
| 28  | 2015 | Emilia-Romagna        |
| 35  | 2015 | Tuscany               |
| 36  | 2015 | Friuli-Venezia Giulia |
| 37  | 2015 | Piedmont              |
| 40  | 2015 | Tuscany               |
| 42  | 2015 | Emilia-Romagna        |
| 43  | 2015 | Umbria                |
| 46  | 2015 | Sardinia              |

|     |      |                       |
|-----|------|-----------------------|
| 52  | 2015 | Sicily                |
| 67  | 2015 | Emilia-Romagna        |
| 88  | 2015 | Emilia-Romagna        |
| 7   | 2016 | Veneto                |
| 18  | 2016 | Sardinia              |
| 27  | 2016 | Sardinia              |
| 33  | 2016 | Veneto                |
| 44  | 2016 | Trentino-Alto Adige   |
| 45  | 2016 | Emilia-Romagna        |
| 51  | 2016 | Sardinia              |
| 53  | 2016 | Lombardy              |
| 54  | 2016 | Emilia-Romagna        |
| 59  | 2016 | Emilia-Romagna        |
| 60  | 2016 | Sardinia              |
| 112 | 2016 | Tuscany               |
| 115 | 2016 | Puglia                |
| 2   | 2017 | Sardinia              |
| 4   | 2017 | Piedmont              |
| 5   | 2017 | Sicily                |
| 8   | 2017 | Sicily                |
| 9   | 2017 | Veneto                |
| 11  | 2017 | Sardinia              |
| 12  | 2017 | Sicily                |
| 13  | 2017 | Abruzzo               |
| 14  | 2017 | Abruzzo               |
| 15  | 2017 | Abruzzo               |
| 16  | 2017 | Tuscany               |
| 17  | 2017 | Sicily                |
| 22  | 2017 | Abruzzo               |
| 24  | 2017 | Sicily                |
| 55  | 2017 | Sicily                |
| 65  | 2017 | Piedmont              |
| 69  | 2017 | Valle d'Aosta         |
| 70  | 2017 | Valle d'Aosta         |
| 71  | 2017 | Abruzzo               |
| 72  | 2017 | Calabria              |
| 74  | 2017 | Abruzzo               |
| 76  | 2017 | Sardinia              |
| 111 | 2017 | Trentino-Alto Adige   |
| 127 | 2017 | Friuli-Venezia Giulia |
| 129 | 2017 | Friuli-Venezia Giulia |
| 130 | 2017 | Friuli-Venezia Giulia |
| 132 | 2017 | Trentino-Alto Adige   |
| 135 | 2017 | Calabria              |
| 136 | 2017 | Campania              |
| 137 | 2017 | Sardinia              |
| 138 | 2017 | Basilicata            |
| 139 | 2017 | Veneto                |
| 140 | 2017 | Valle d'Aosta         |
| 141 | 2017 | Calabria              |

|     |      |          |
|-----|------|----------|
| 142 | 2017 | Calabria |
| 143 | 2017 | Veneto   |

---

**Supplementary Figure S1.** Density maps of the corresponding honey mtDNA profiles. **(a)** Honey samples with mitotype C. **(b)** Honey samples with mitotype A. **(c)** Honey samples with mitotype M.

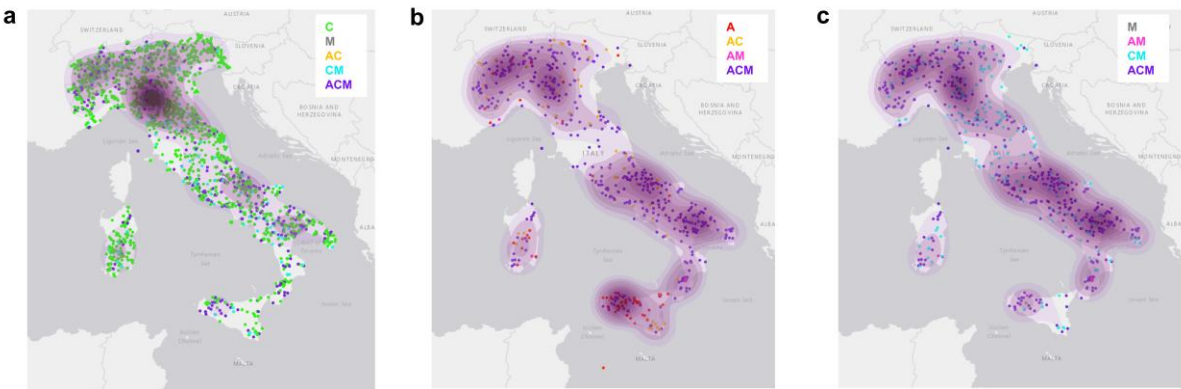

**Supplementary Figure S2.** Alignment of the targeted *Apis mellifera* mitochondrial DNA (mtDNA) region with the gaps indicated with “-“ that can discriminate three main lineages [53]: A (152 bp), M (138 bp) and C (85 bp). Reported sequences are from the A1 mitotype (Gen-Bank/EMBL accession number: EF033649), the M4 mitotype (FJ743637) and C1 mitotype (FJ478010). Other mitotypes of the same lineages might differ on size for a few nucleotides. More details are reported in Utzeri et al. [53], which includes an extended alignment of *A. mellifera* mtDNA sequences. The PCR primer regions are underlined.

```

1   5   10  15  20  25  30  35  40  45  50  55  60  65  70  75  80  85  90  95  100 105 110 115 120 125 130 135 140 145 150
A- GGCAGATAAGTGCATTGAACTTAAGATTCAAATATAAAGTATTTTAAACTTTTATTAAAAATTAATAAATTAATATAAAATAAAACAAAATATAACAAAATATATTATTAAAAATTTAATTTATAAAATTCGCCACTTAATTCATATTAA
M- GGCAGATAAGTGCATTGAACTTAAGATTCAAATATAAAGTATTTTAAACTTTTATTAAAAATTAATAAATTAATATAAAATAAAACAAAATATAACAAAATATATTATTAAAAATTTAATTTATAAAATTCGCCACTTAATTCATATTAA
C- GGCAGATAAGTGCATTGAACTTAAGATTCAAATATAAAGTATTTTAAACTTTTATTAAAAATTAATAAATTAATATAAAATAAAACAAAATATAACAAAATATATTATTAAAAATTTAATTTATAAAATTCGCCACTTAATTCATATTAA

```

**Supplementary Figure S3.** Examples of gel electrophoresis patterns of the *Apis mellifera* mtDNA amplified fragments obtained from the DNA of several honey samples (lanes from 1 to 5): A lineage (band of 152 bp), M lineage (band of 138 bp) and C lineage (band of 85 bp). L: DNA ladder. Some honey samples had more than one band as described in the main text.

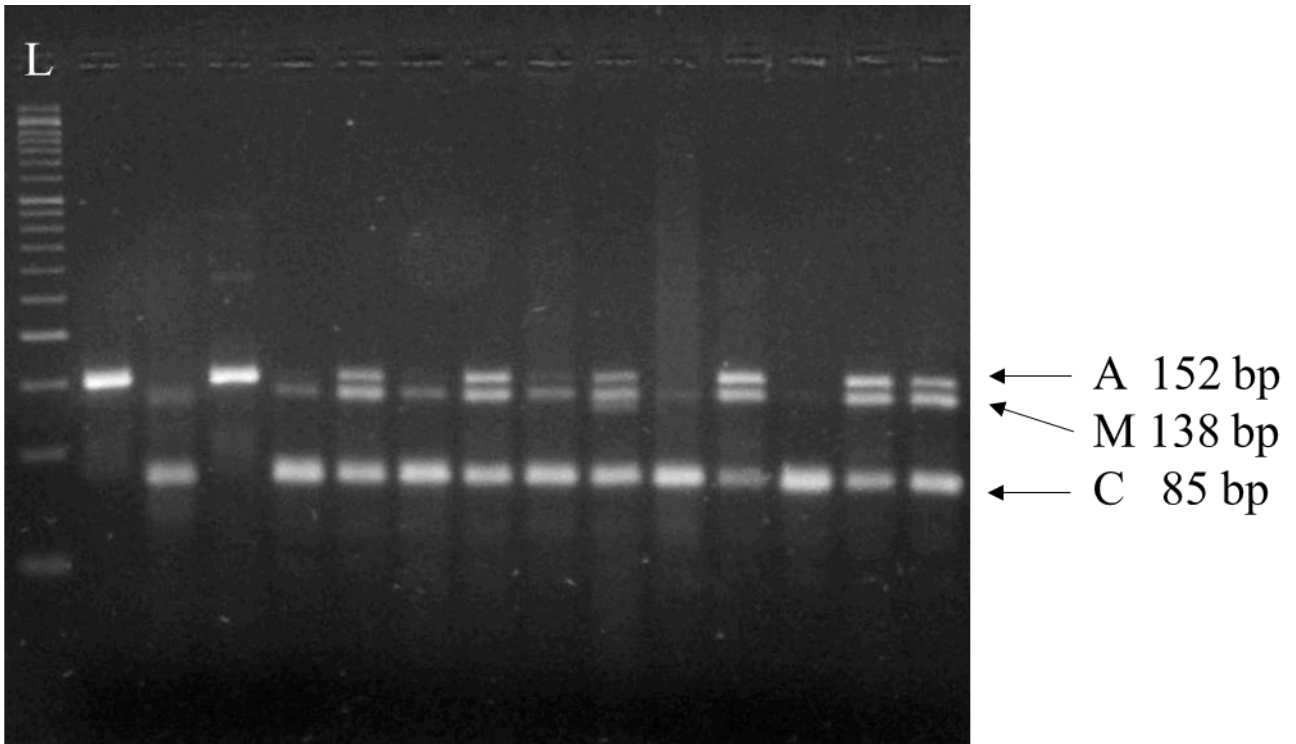

Supplement: MOESM1 [file 41598_2026_43936_MOESM1_ESM.pdf]
